# Supplementary material for: Synthesis and discovery of asiatic acid based 1,2,3-triazole derivatives as antitumor agents blocking NF-κB activation and cell migration
Source: Royal Society of Chemistry journal article supplement (doi:10.1039/c8md00620b), 2019-01-01

**Synthesis and discovery of asiatic acid based 1,2,3-triazoles derivatives as  
antitumor agents blocking NF- $\kappa$ B activation and cell migration**

Ri-Zhen Huang<sup>a, b, 1</sup>, Gui-Bin Liang<sup>d, 1</sup>, Mei-Shan Li<sup>d</sup>, Yi-Lin Fang<sup>d</sup>, Shi-Feng Zhao<sup>a</sup>, Mei-Mei Zhou<sup>d</sup>, Zhi-Xin Liao<sup>a, b\*</sup>, Jing Sun<sup>c\*</sup>, Heng-Shan Wang<sup>d\*</sup>

<sup>a</sup> *Department of Pharmaceutical Engineering, School of Chemistry and Chemical Engineering, Southeast University, Nanjing 211189, P.R. China*

<sup>b</sup> *Jiangsu Province Hi-Tech Key Laboratory for Biomedical Research, Southeast University, Nanjing 211189, P.R. China*

<sup>c</sup> *Chinese Acad Sci, Northwest Inst Plateau Biol, Qinghai Key Laboratory of Qinghai-Tibet Plateau Biological Resources, Xining, 810000, P.R. China*

<sup>d</sup> *State Key Laboratory for the Chemistry and Molecular Engineering of Medicinal Resources (Ministry of Education of China), School of Chemistry and Pharmaceutical Sciences of Guangxi Normal University, Guilin 541004, PR China*

\* Corresponding author.

\*\*Corresponding author at: Department of Pharmaceutical Engineering, School of Chemistry and Chemical Engineering, Southeast University, Nanjing 211189, China

E-mail addresses: [zxiao@seu.edu.cn](mailto:zxiao@seu.edu.cn) (Z. -X. Liao), [sunj@nwipb.cas.cn](mailto:sunj@nwipb.cas.cn) (J. S), [whengshan@163.com](mailto:whengshan@163.com) (H. -S. Wang).

<sup>1</sup> Co-first author: These authors contributed equally to this work.

**Table S1.** Docking scores (kcal/mol) for all studied compounds

| Comd.     | Total score | Crash  | Polar | D_score | PMF_score | G_score | Chem score | Cscore |
|-----------|-------------|--------|-------|---------|-----------|---------|------------|--------|
| <b>5a</b> | 8.29        | -20.84 | 0.57  | -179.86 | -81.73    | -60.20  | -5.48      | 3      |
| <b>5b</b> | 8.07        | -28.64 | 0.21  | -221.16 | -92.19    | -418.81 | -24.65     | 2      |
| <b>5c</b> | 8.94        | -23.95 | 0.55  | -243.66 | -133.28   | -443.34 | -40.06     | 3      |
| <b>5d</b> | 7.53        | -21.54 | 2.33  | -294.90 | -97.15    | -528.96 | -46.25     | 5      |
| <b>5e</b> | 7.00        | -24.01 | 0.82  | -272.06 | -146.81   | -504.74 | -37.39     | 4      |
| <b>5f</b> | 8.60        | -29.61 | 0.31  | -352.11 | -35.83    | -546.92 | -42.16     | 4      |
| <b>5g</b> | 9.02        | -29.03 | 1.10  | -267.71 | -113.76   | -512.64 | -34.25     | 5      |
| <b>5h</b> | 8.64        | -23.93 | 0.16  | -238.09 | -98.21    | -440.74 | -30.99     | 3      |
| <b>6a</b> | 8.16        | -17.65 | 2.45  | -227.82 | -58.56    | -362.49 | -41.78     | 2      |
| <b>6b</b> | 9.67        | -38.19 | 1.29  | -282.66 | -62.68    | -516.16 | -40.42     | 4      |
| <b>6c</b> | 5.11        | -15.67 | 2.45  | -175.22 | -67.91    | -368.97 | -30.06     | 2      |
| <b>6d</b> | 7.92        | -23.05 | 1.20  | -244.23 | -138.36   | -498.41 | -37.53     | 3      |
| <b>6e</b> | 7.13        | -21.13 | 0.15  | -179.91 | -30.43    | -336.73 | -25.32     | 4      |
| <b>6f</b> | 9.25        | -15.52 | 3.22  | -180.76 | -68.64    | -386.59 | -35.75     | 3      |
| <b>6g</b> | 6.56        | -30.26 | 1.07  | -185.38 | -22.30    | -318.31 | -30.93     | 2      |
| <b>6h</b> | 9.43        | -37.56 | 1.45  | -181.09 | -48.65    | -287.17 | -26.19     | 4      |
| <b>6i</b> | 9.38        | -14.94 | 2.02  | -197.39 | -38.91    | -397.39 | 32.94      | 2      |
| <b>6j</b> | 10.75       | -12.44 | 2.23  | -216.12 | -29.10    | -374.00 | -31.94     | 2      |
| <b>6k</b> | 10.08       | -25.76 | 1.07  | -266.97 | -88.19    | -508.92 | -47.95     | 4      |
| <b>6l</b> | 8.21        | -19.08 | -0.69 | -273.98 | -113.34   | -535.35 | -40.53     | 3      |

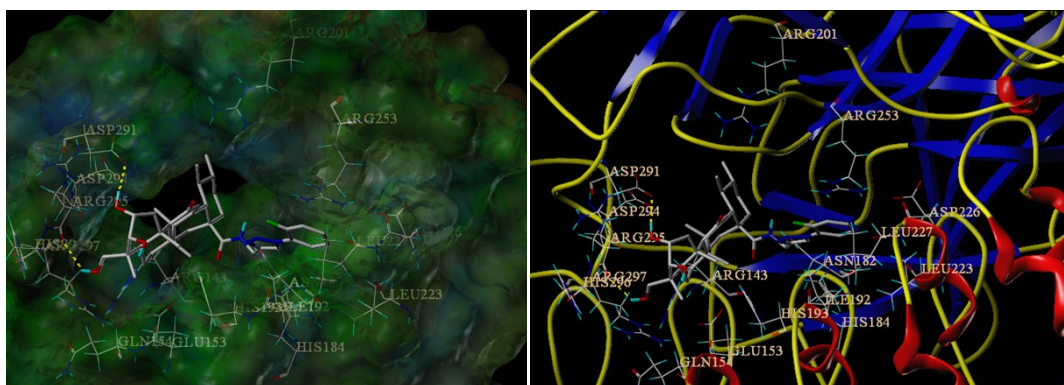

**Fig. S1** Binding modes of compound **6k** in the active site of NF- $\kappa$ B (PDB: 1IKN). Ligands and the important residues for binding interactions are represented by stick and line models. The hydrogen bonds are shown as yellow dotted lines (color figure online).

$^1\text{H}$  NMR,  $^{13}\text{C}$  NMR and HR-MS of compounds **5a–5h** and **6a–6l**:

**5a**

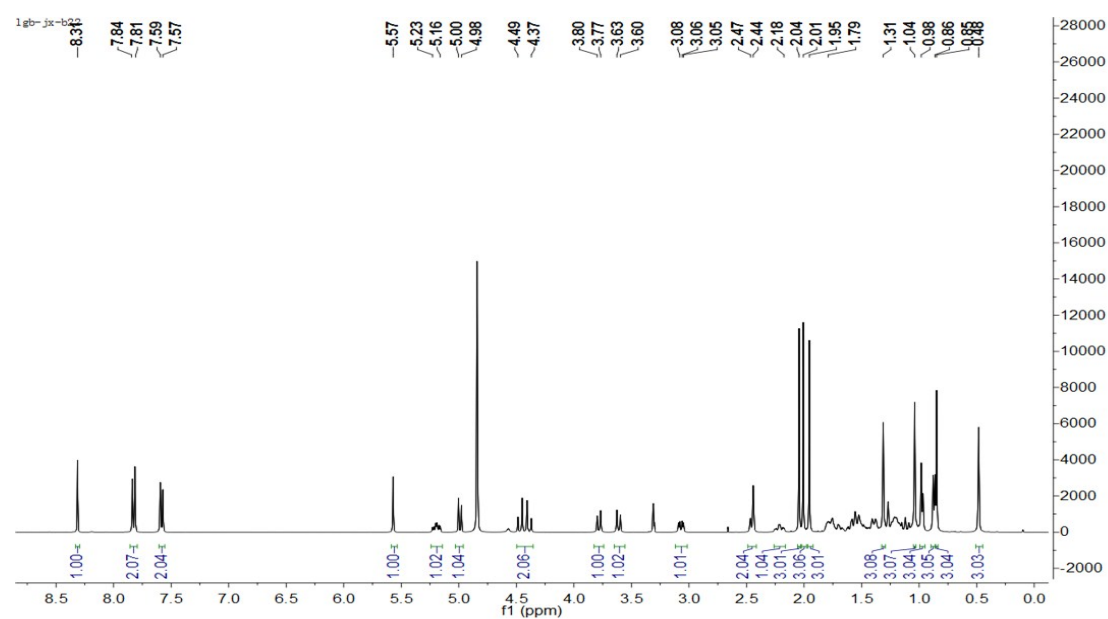

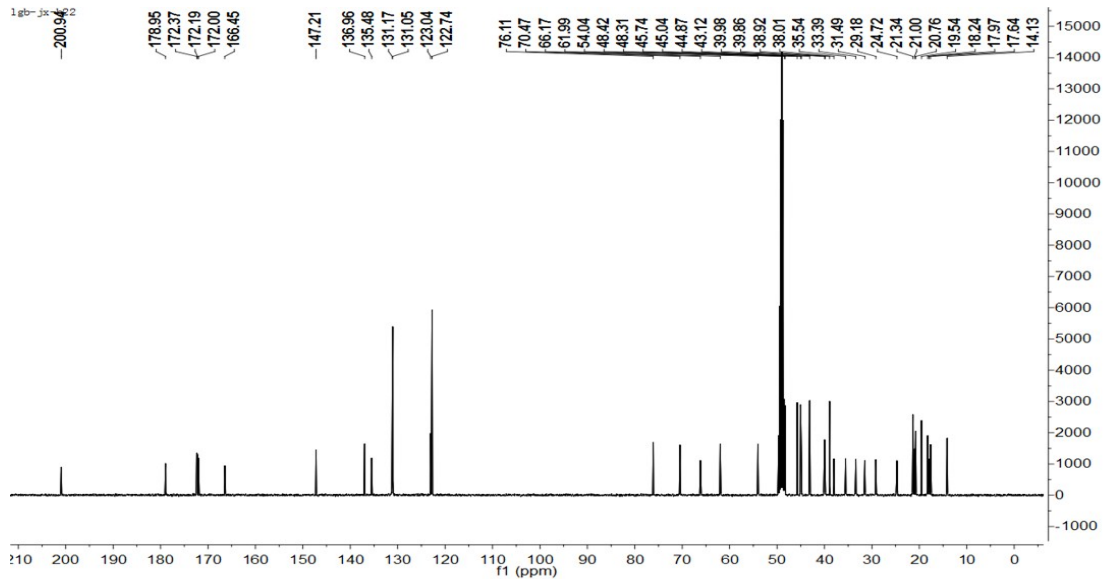

b22\_170704163531#20 RT: 0.07 AV: 1 NL: 3.62E6  
T: FTMS + p ESI Full ms [700.00-950.00]

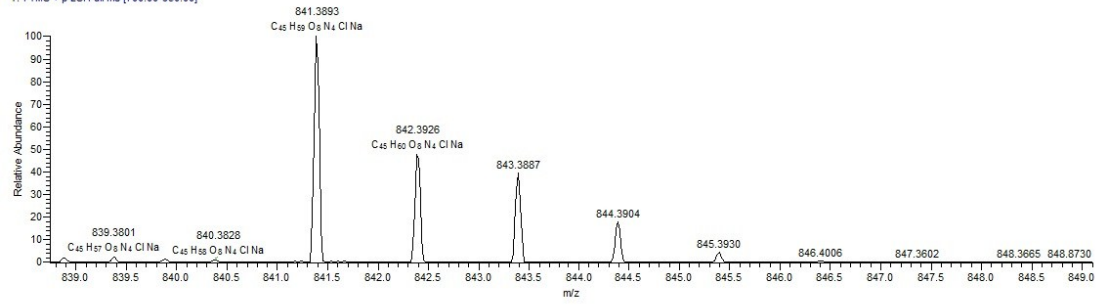

5b

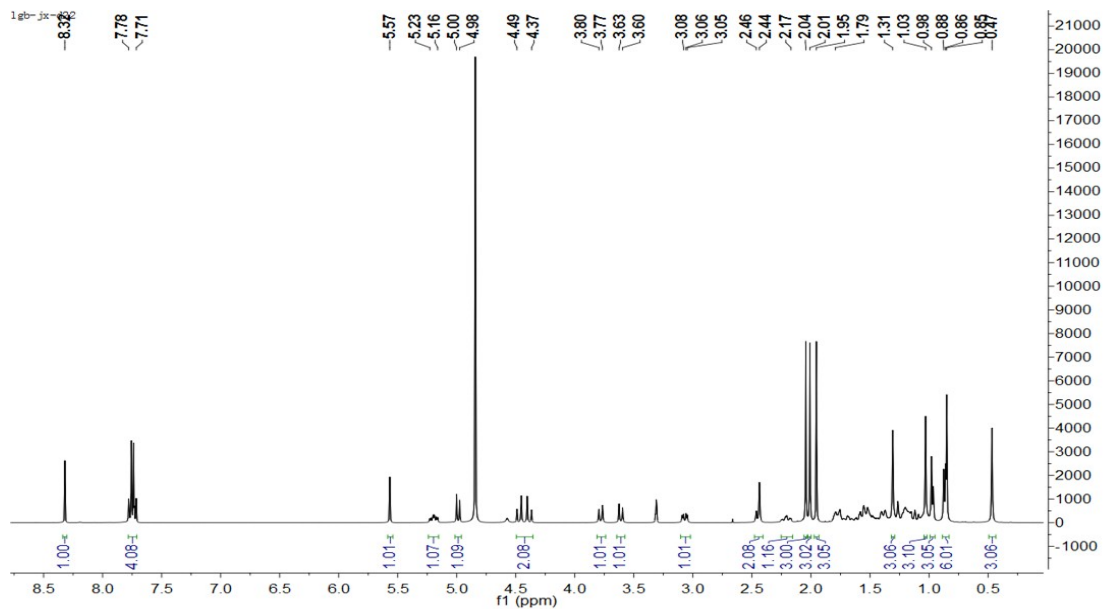

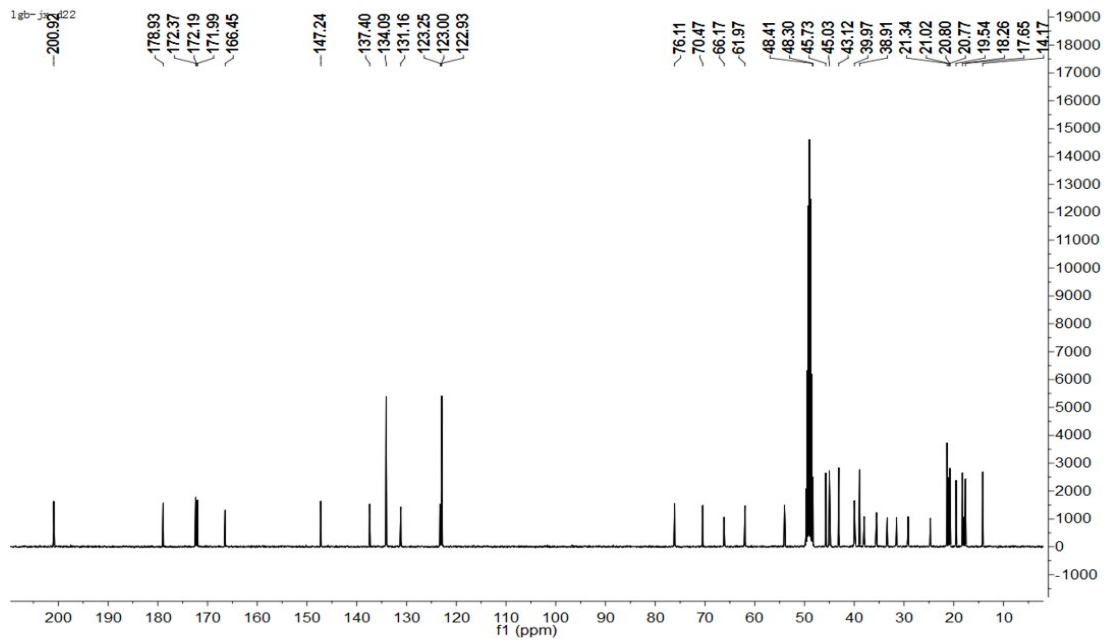

d22 #7 RT: 0.03 AV: 1 NL: 1.35E6  
T: FTMS + p ESI Full ms [700.00-950.00]

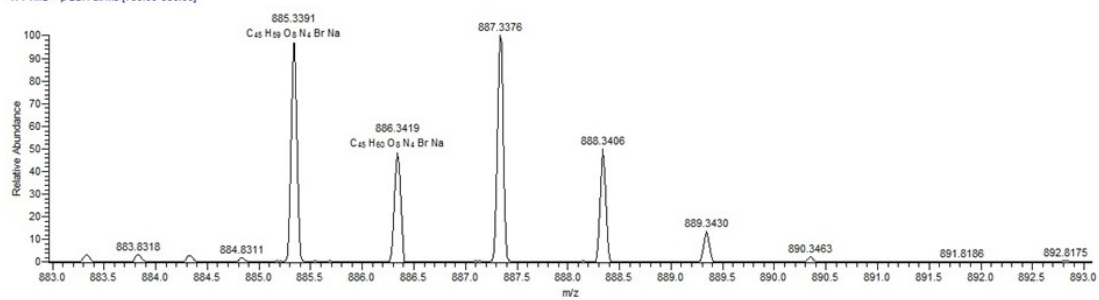

5c

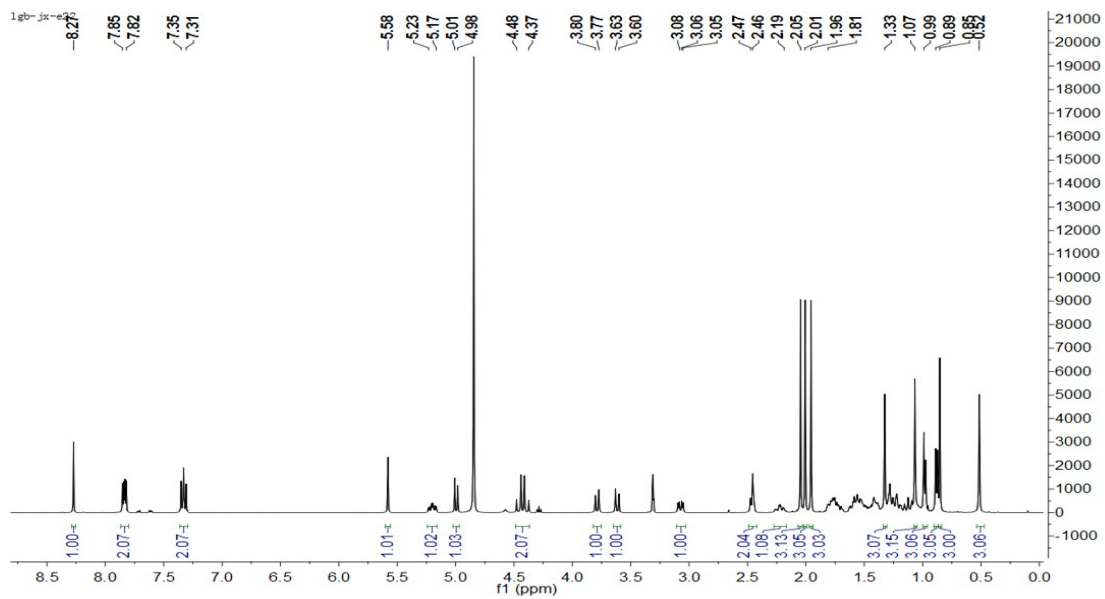

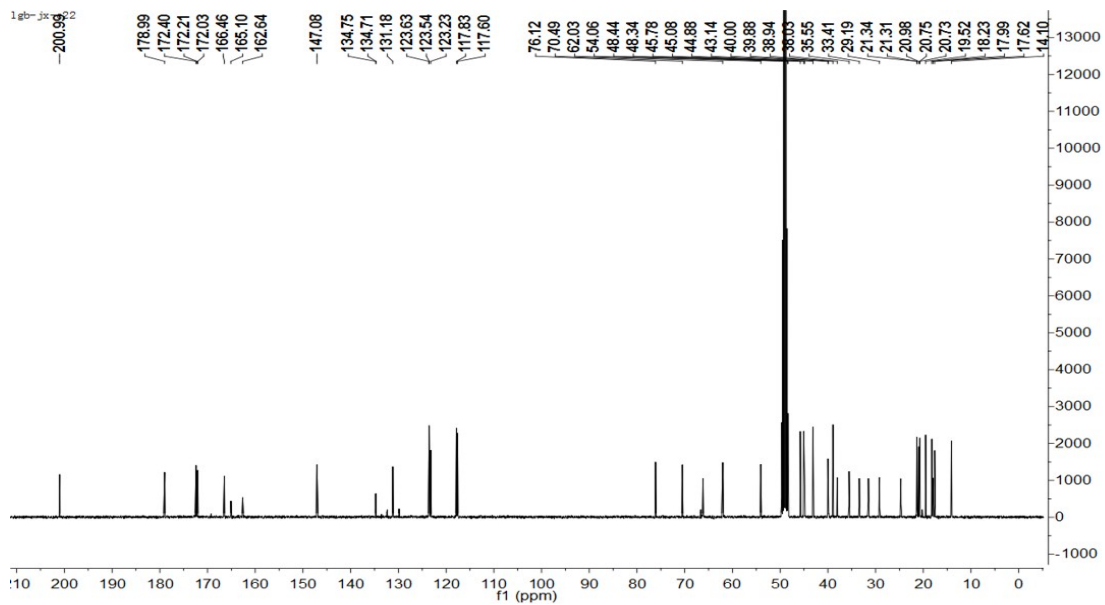

e22 #9 RT: 0.03 AV: 1 NL: 1.12E7  
T: FTMS + p ESI Full ms [700.00-900.00]

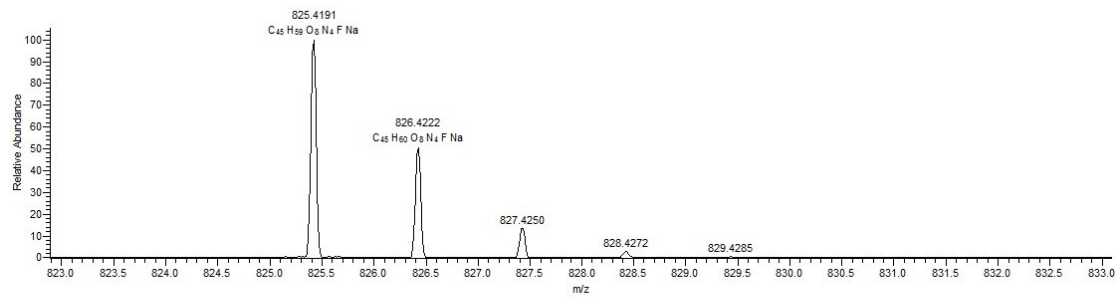

5d

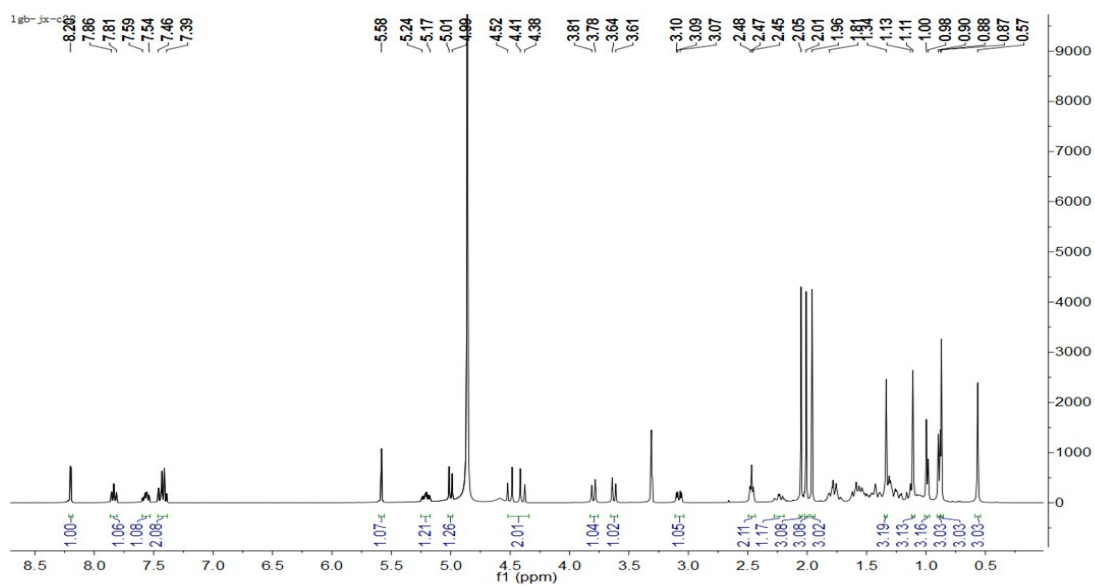

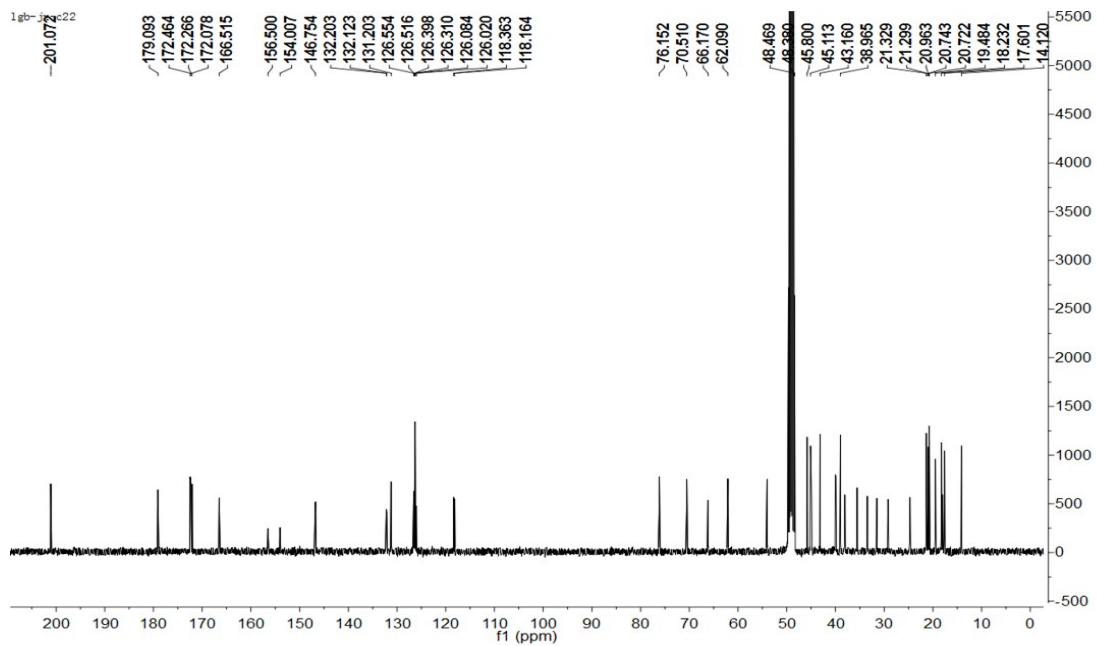

c22 #17 RT: 0.06 AV: 1 NL: 4.07E6  
T: FTMS + p ESI Full ms [700.00-900.00]

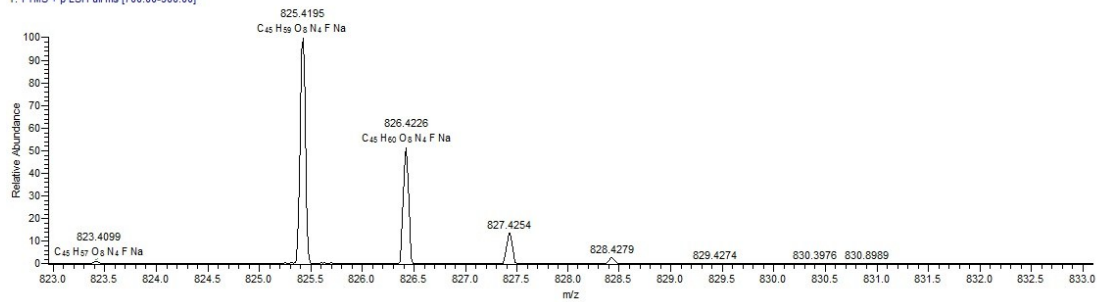

5e

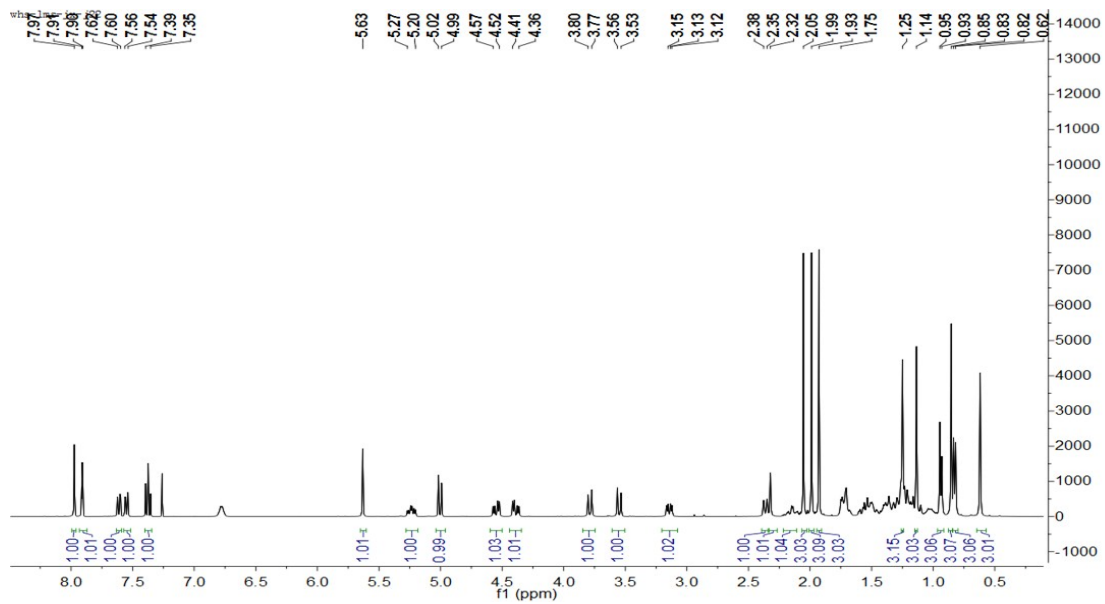

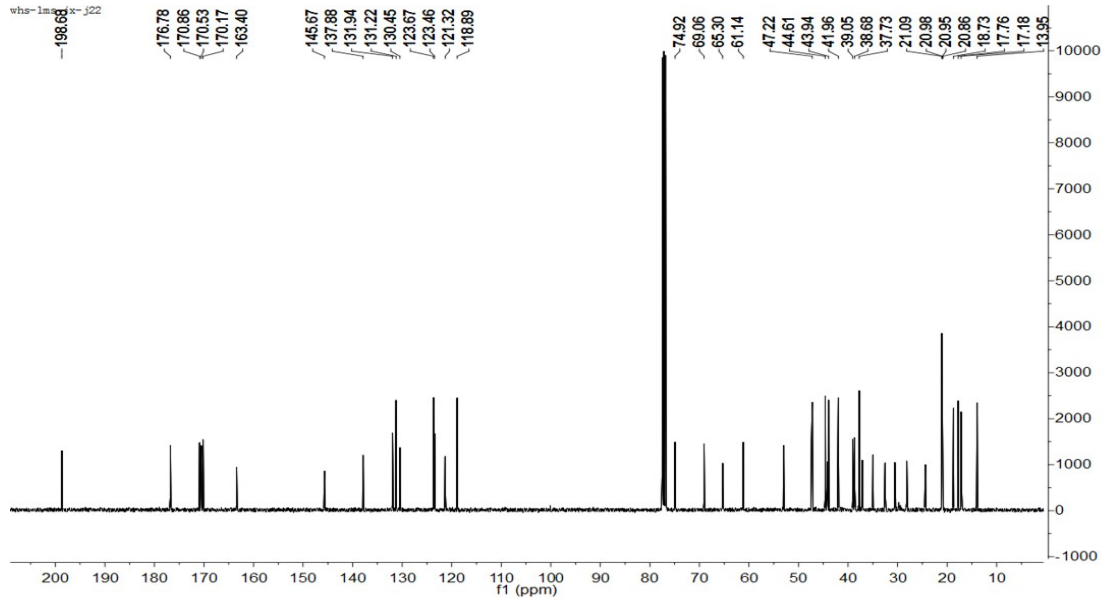

j22\_170704161137 #13 RT: 0.05 AV: 1 NL: 6.98E6  
T: FTMS + p ESI Full ms [750.00-950.00]

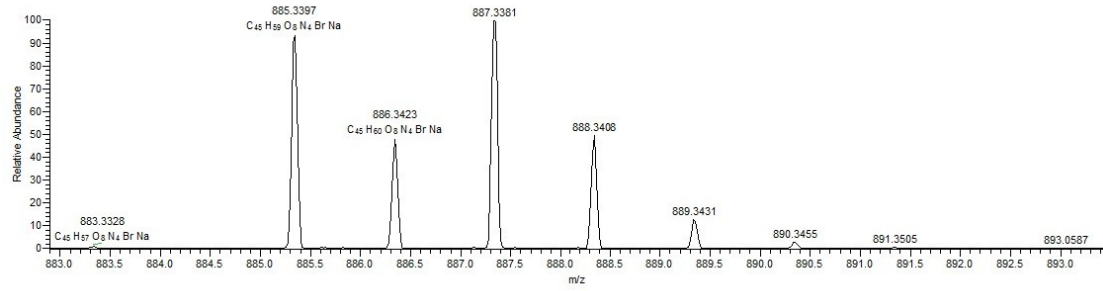

5f

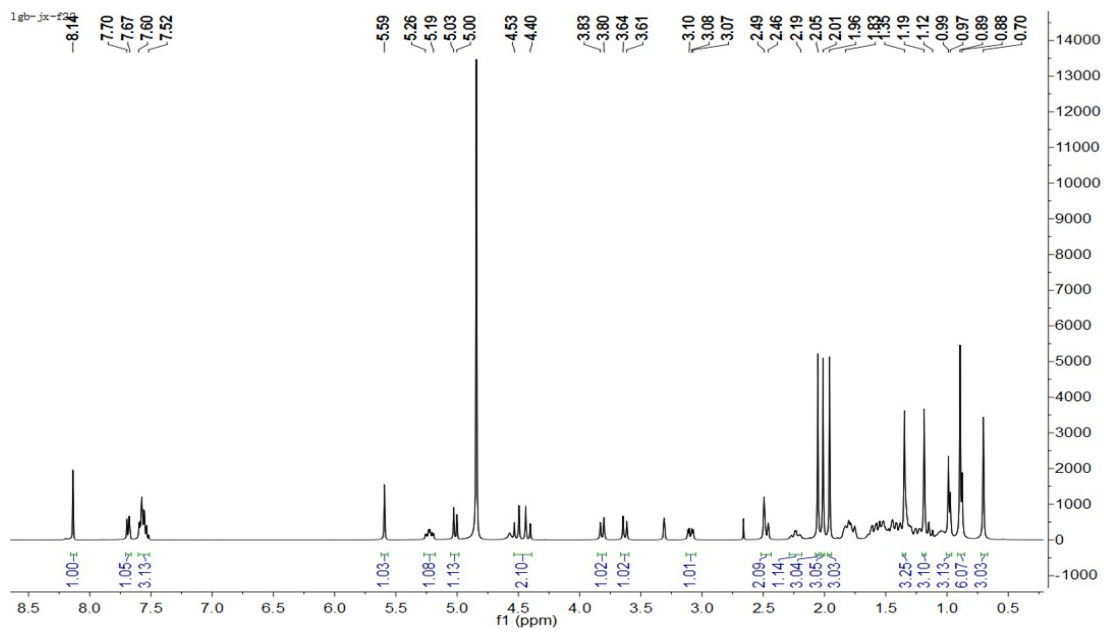



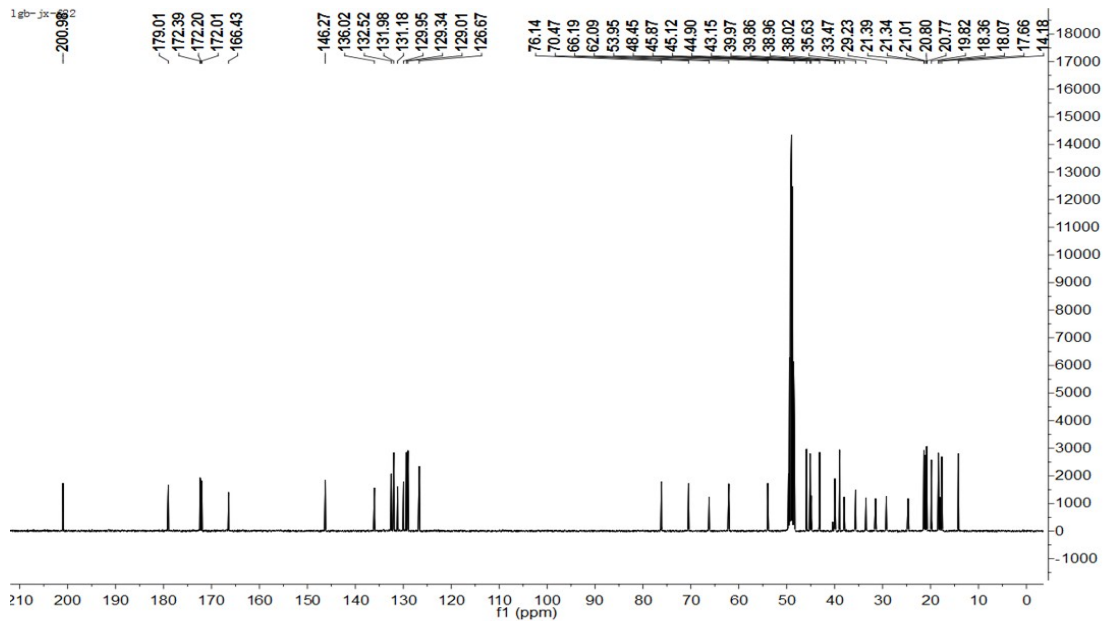

f22\_170704162840 #3 RT: 0.01 AV: 1 NL: 1.03E6  
T: FTMS + p ESI Full ms [700.00-950.00]

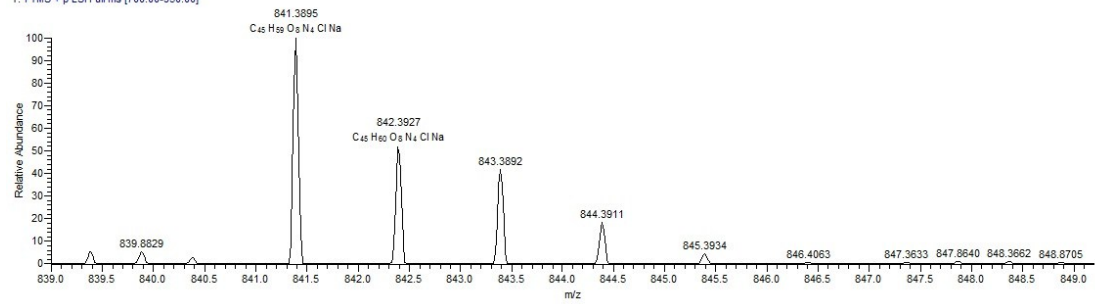

5g

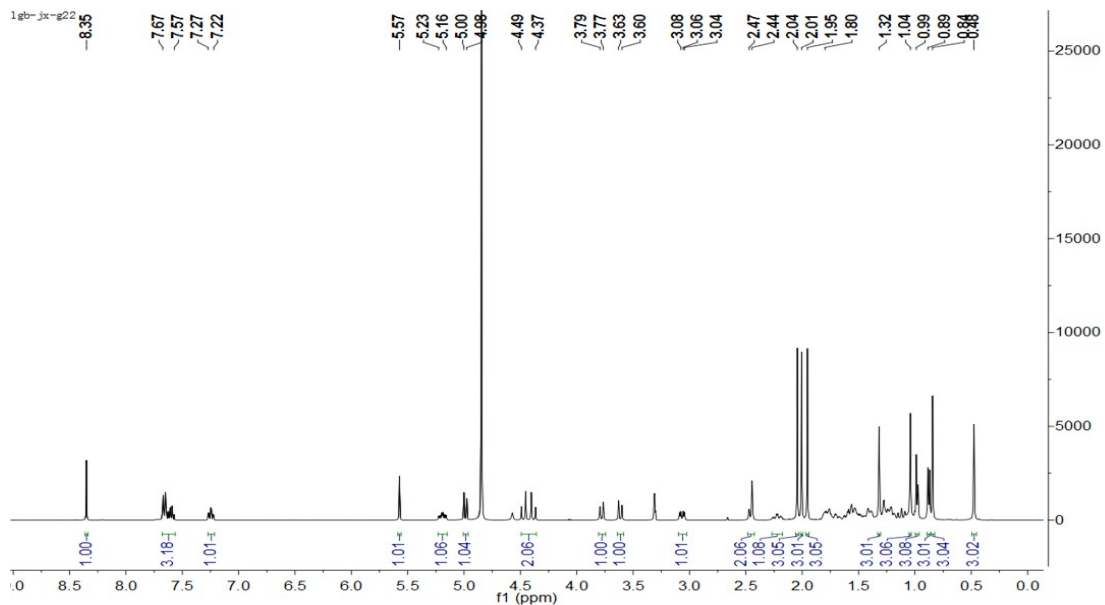

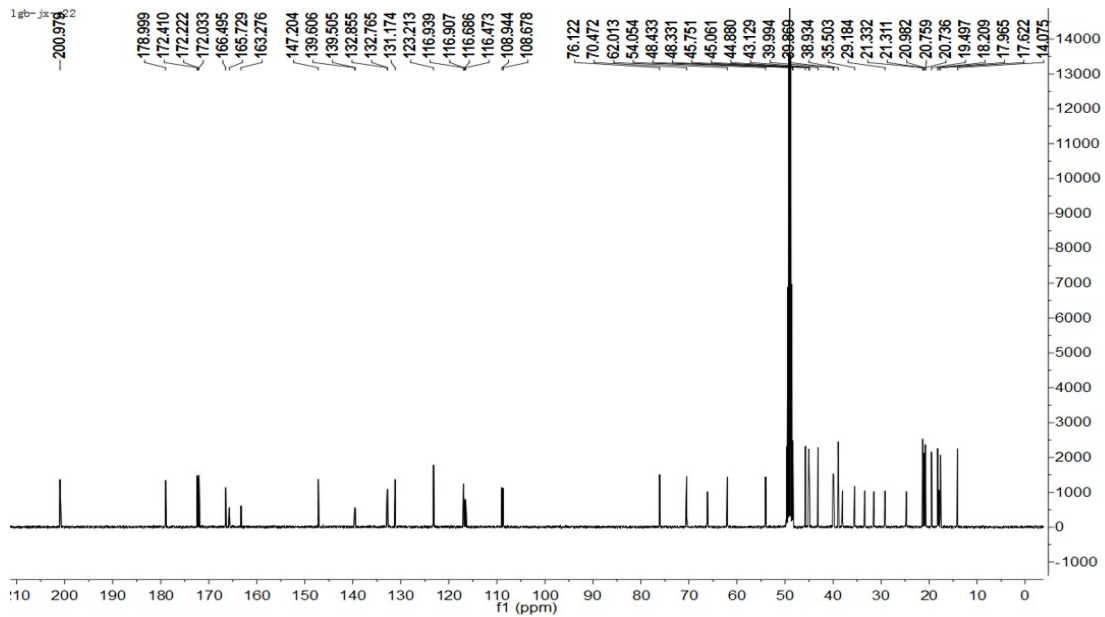

g22\_170704154905 #11 RT: 0.04 AV: 1 NL: 3.45E6  
T: FTMS + p ESI Full ms [750.00-900.00]

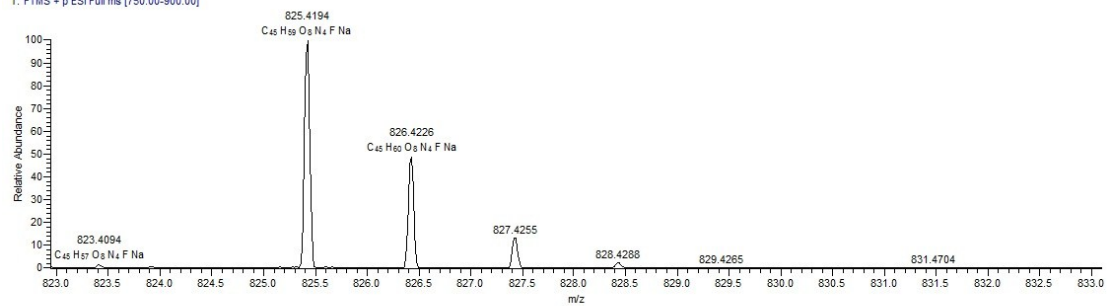

5h

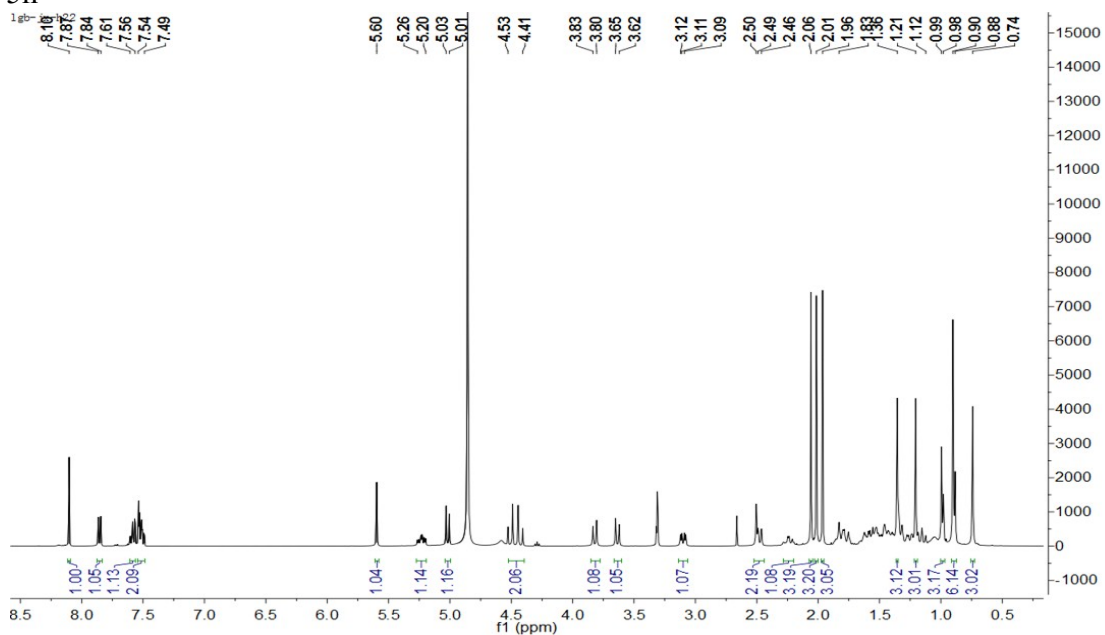

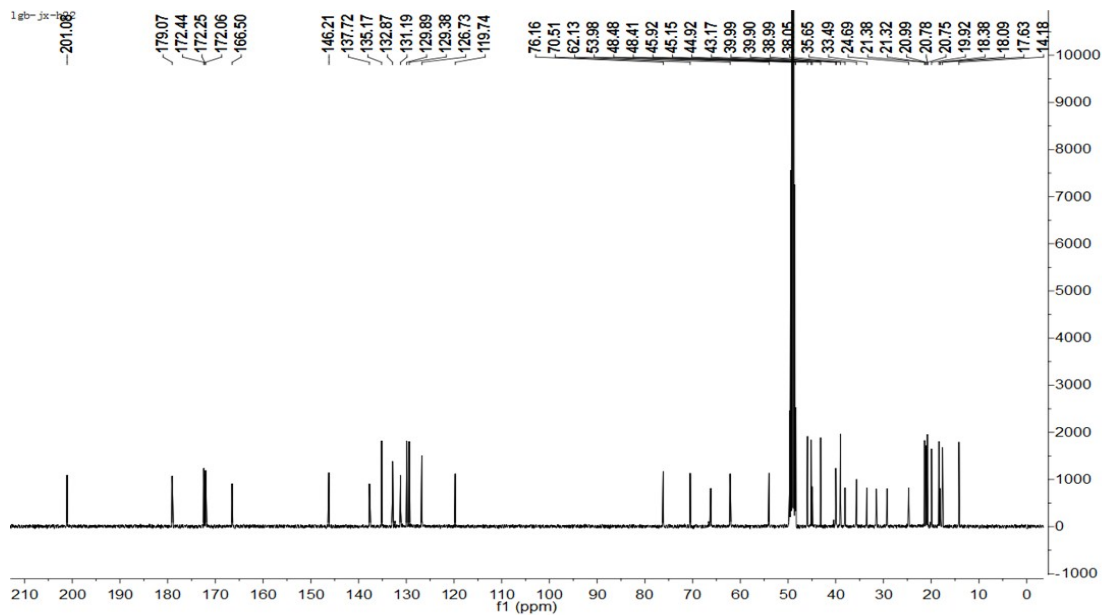

h22 #13 RT: 0.05 AV: 1 NL: 1.29E6  
T: FTMS + p ESI Full ms [750.00-900.00]

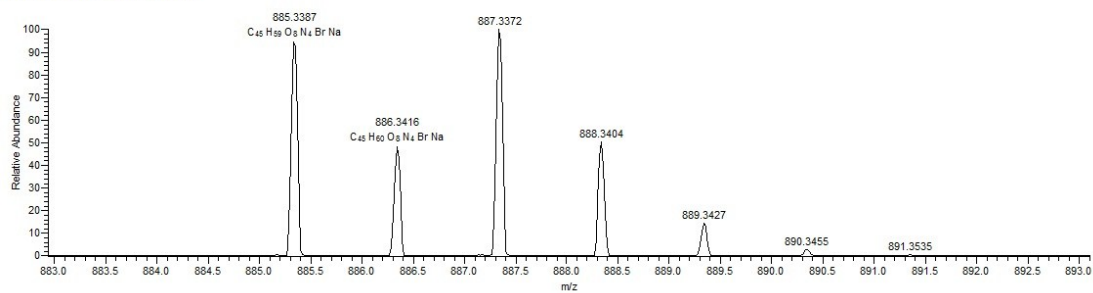

6a

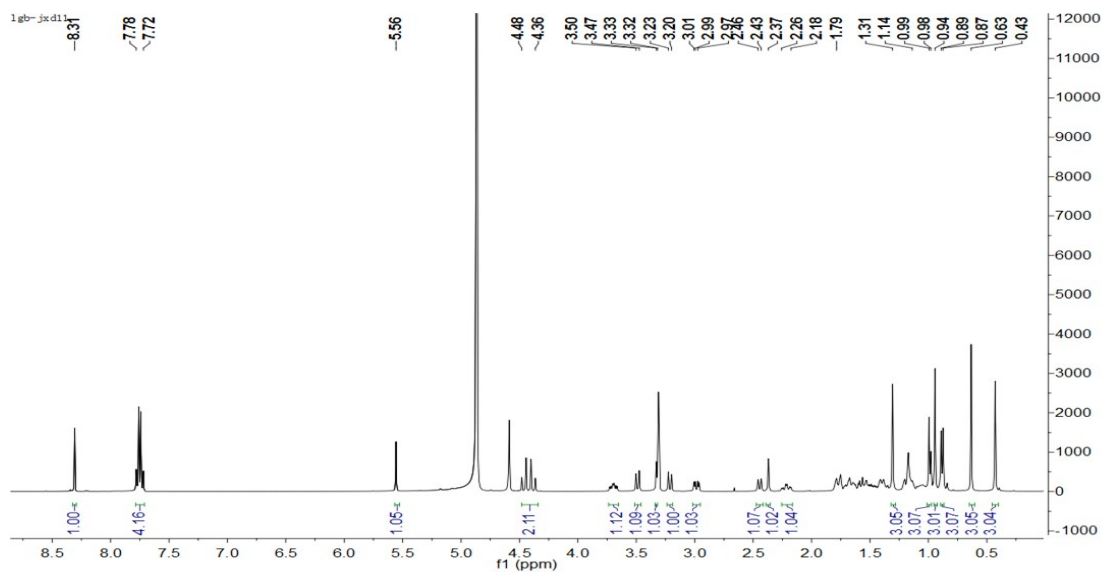

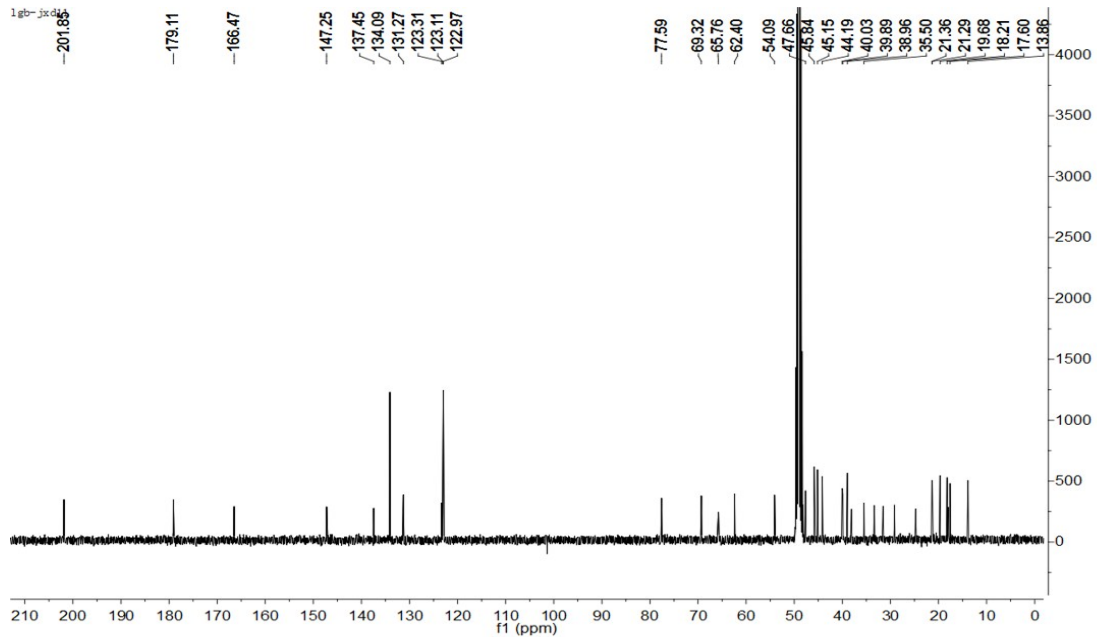

d11 #13 RT: 0.05 AV: 1 NL: 1.75E6  
T: FTMS + p ESI Full ms [850.00-850.00]

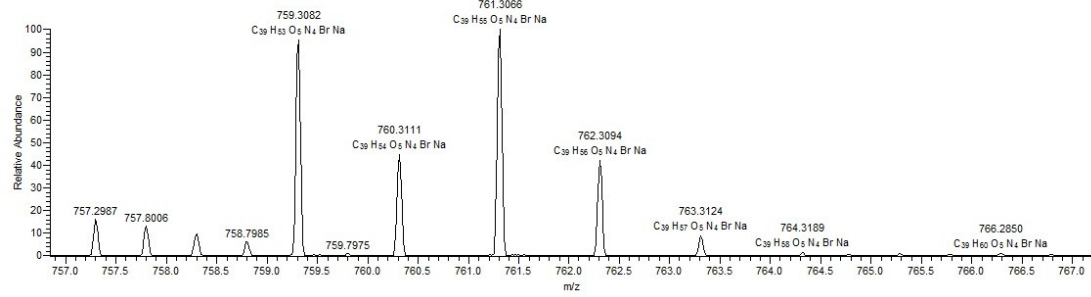

6b

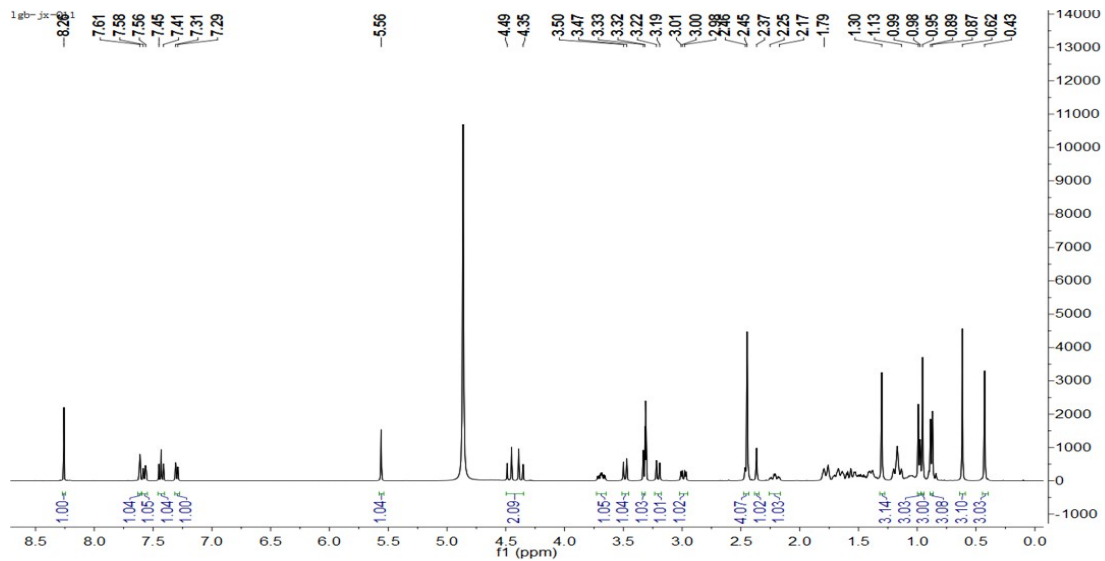

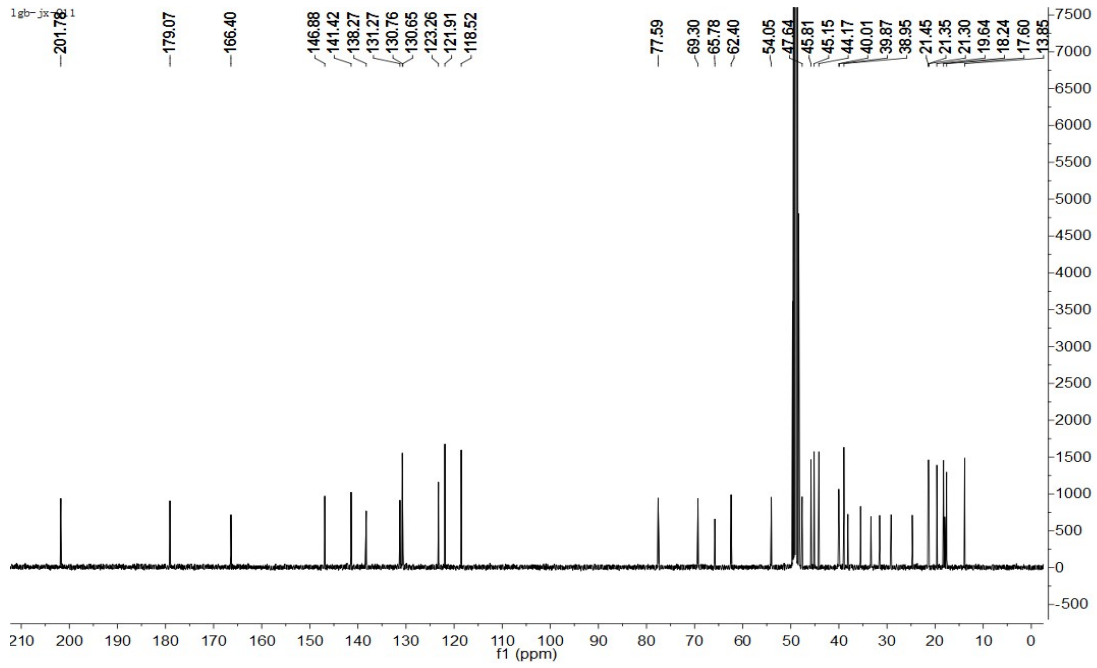

q11 #2 RT: 0.01 AV: 1 NL: 2.42E6  
 T: FTMS - p ESI Full ms [600.00-800.00]

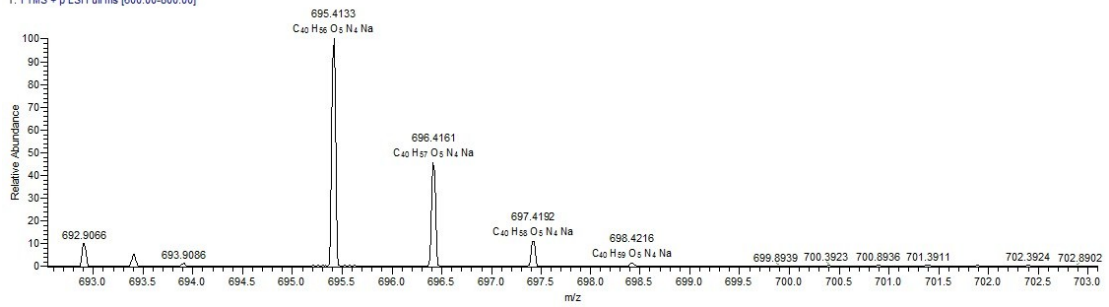

6c

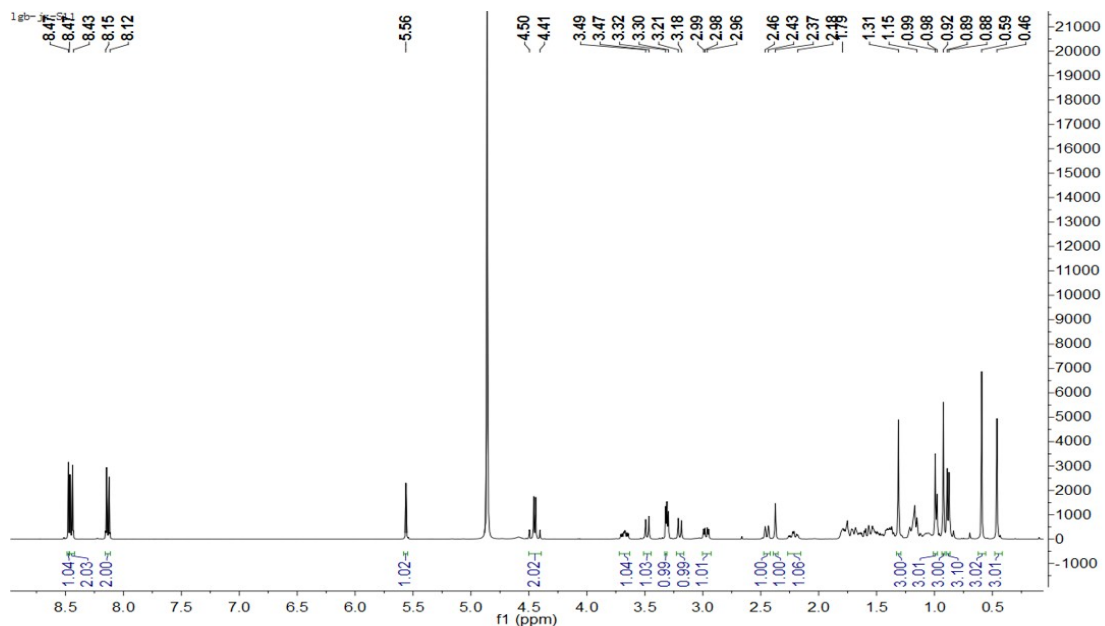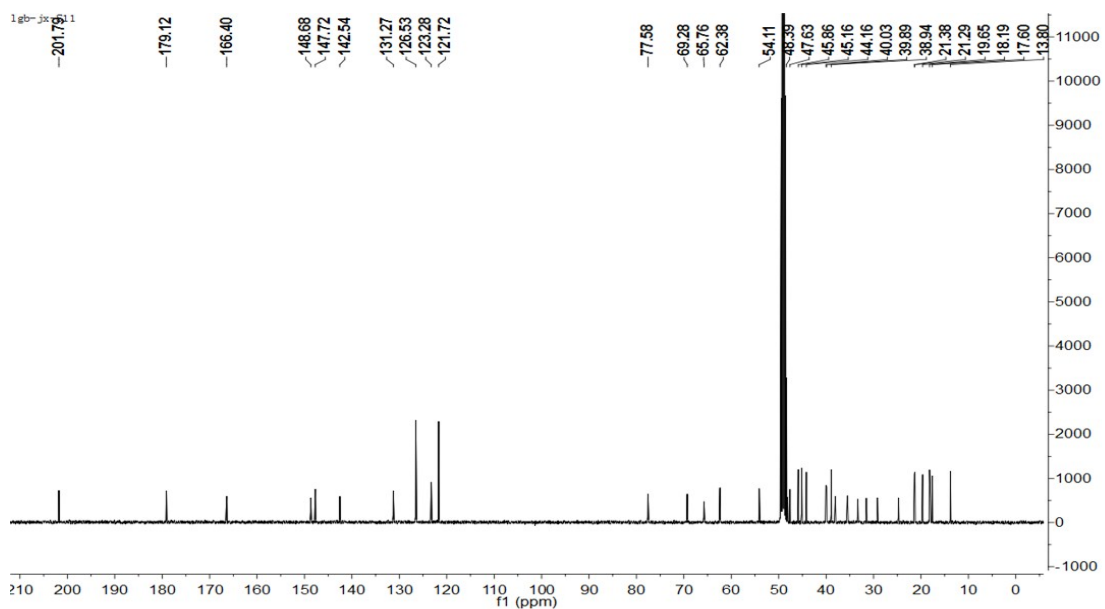

s11\_170704155519 #15 RT: 0.05 AV: 1 NL: 4.20E6  
 T: FTMS + p ESI Full ms [800.00-800.00]

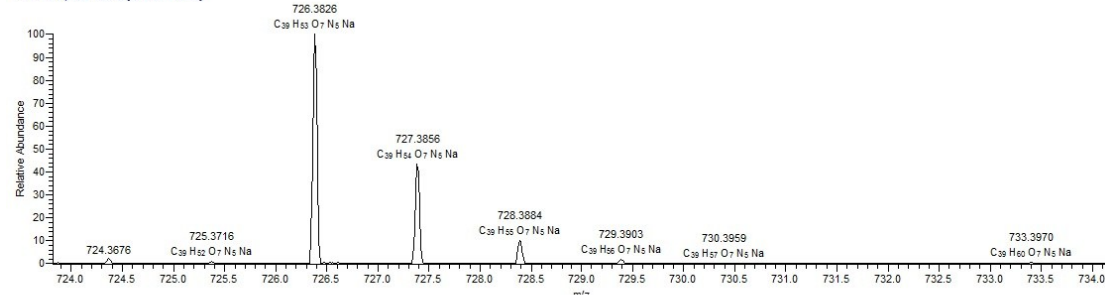

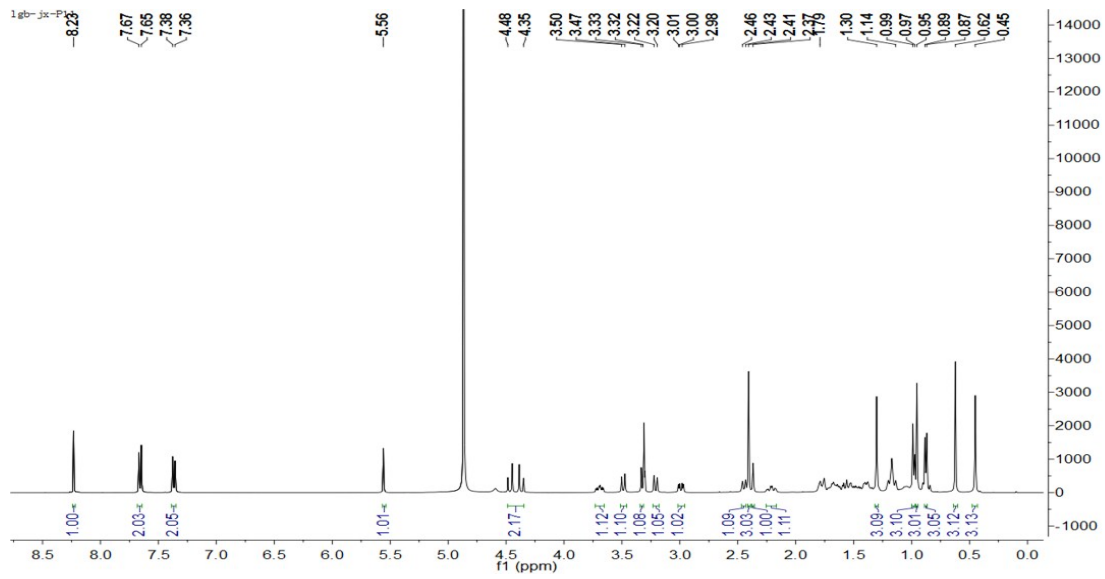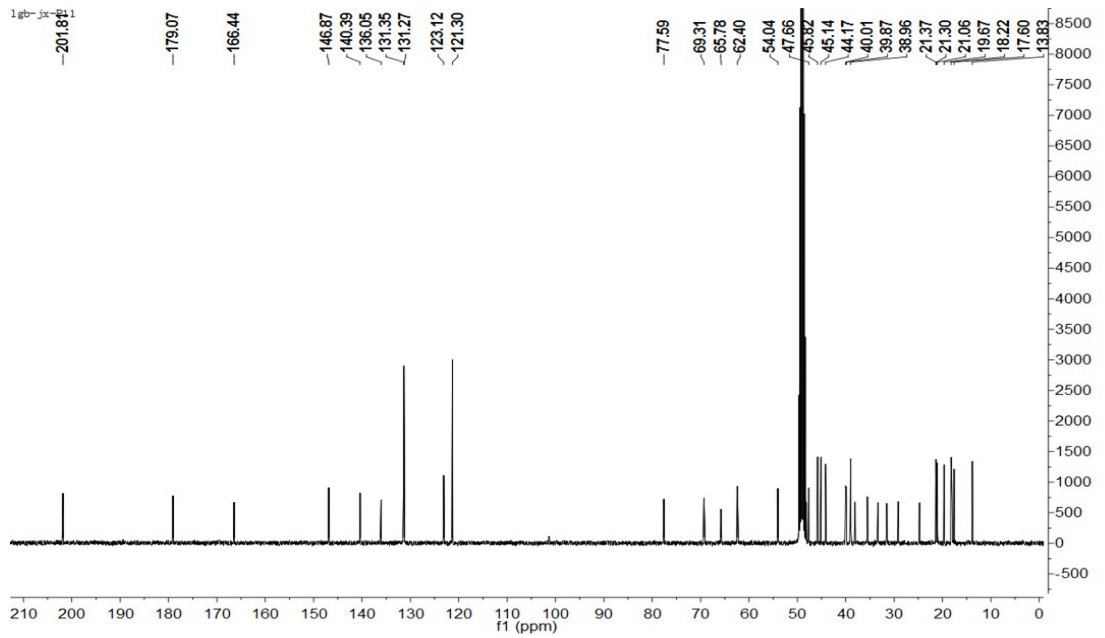

p11 #9 RT: 0.03 AV: 1 NL: 1.95E6  
T: FTMS + p ESI Full ms [800.00-800.00]

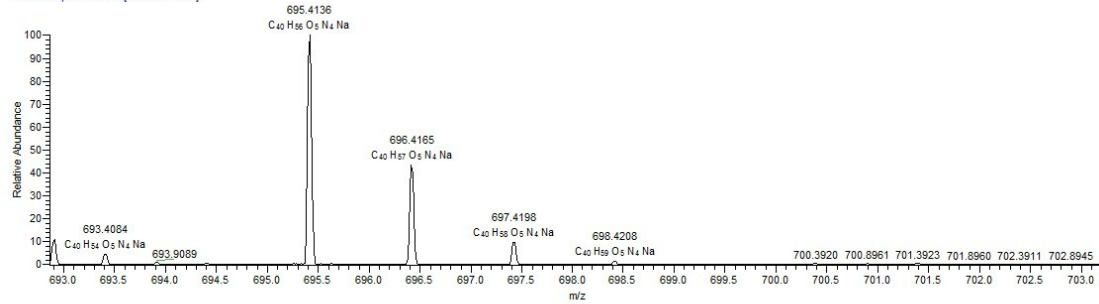

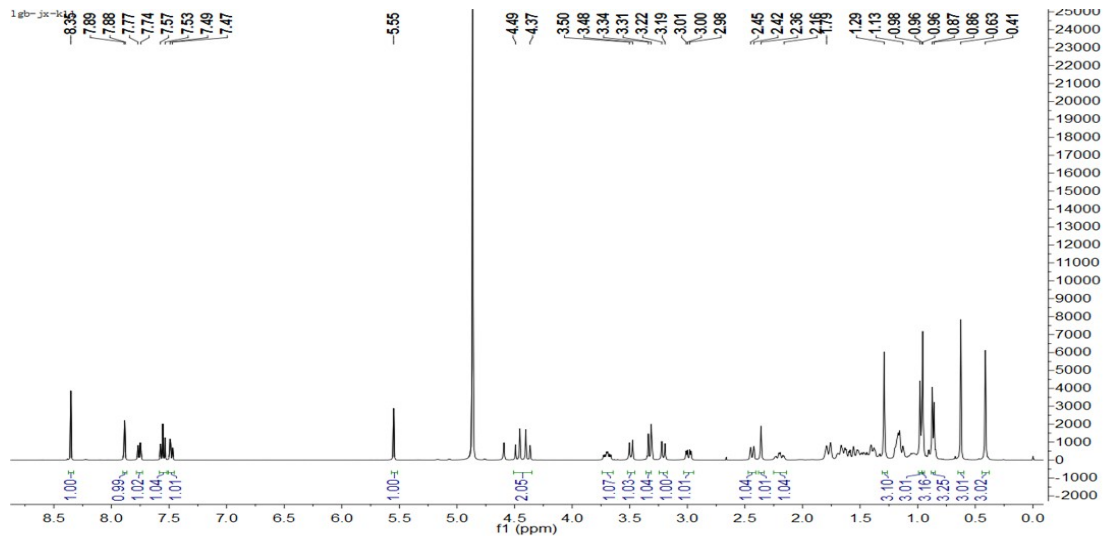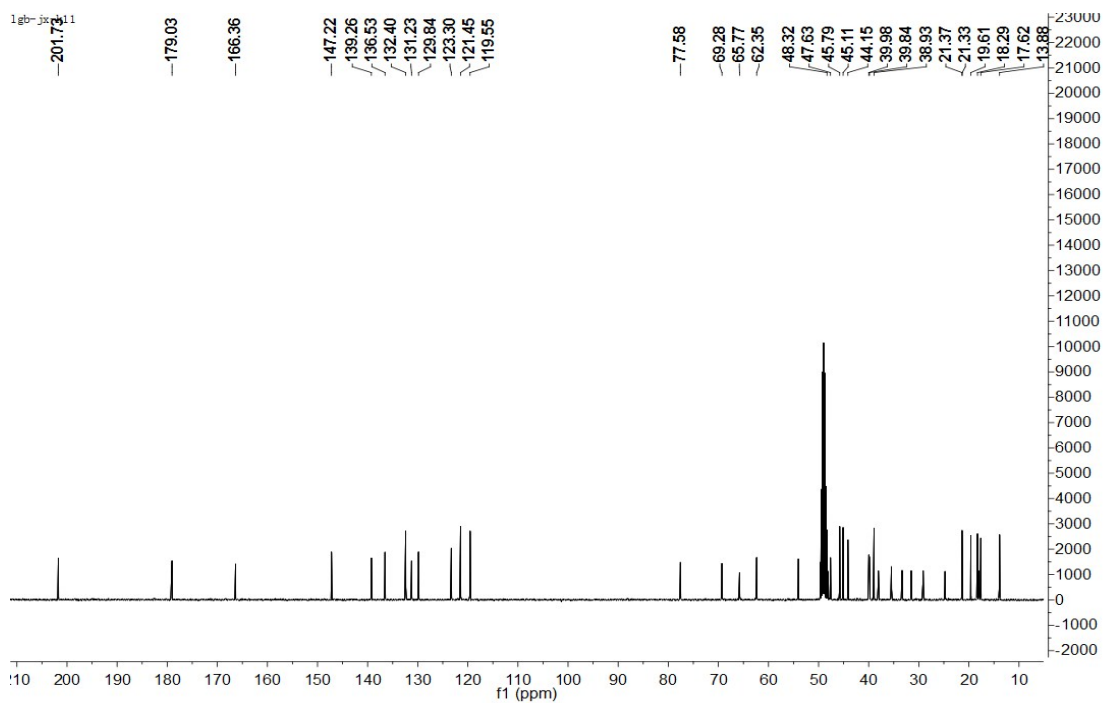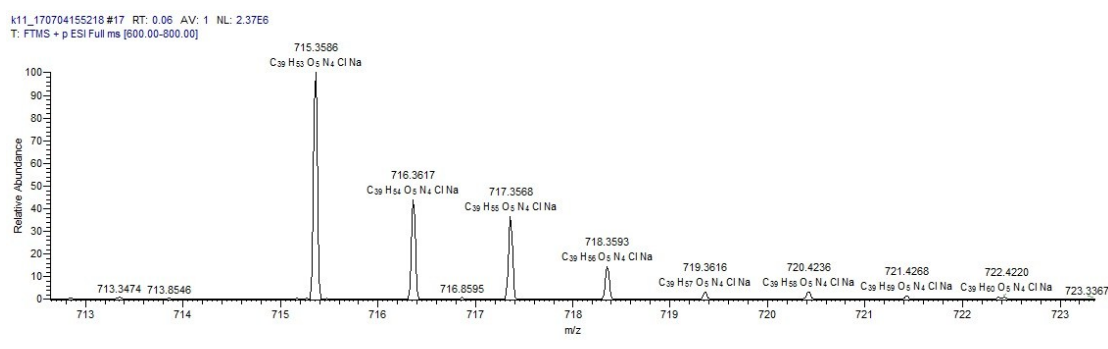



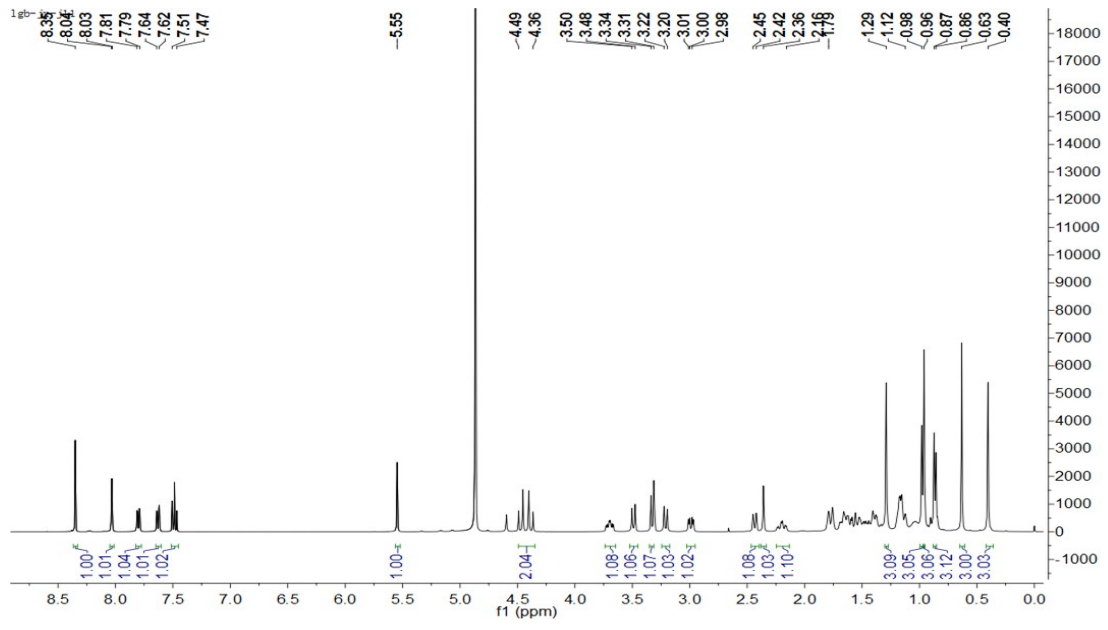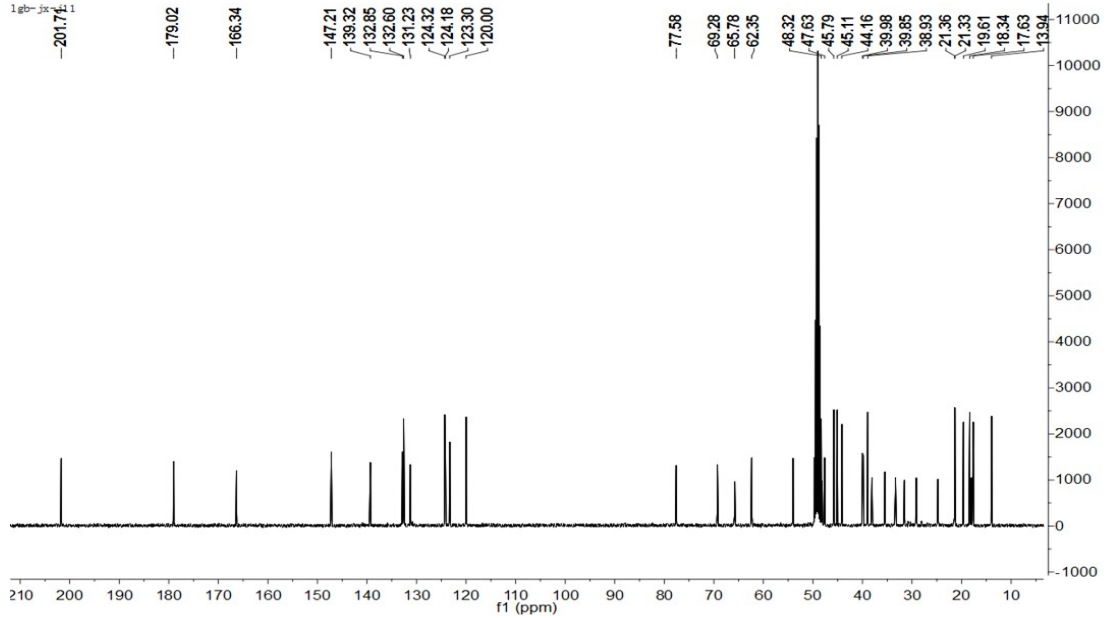

j11\_170704154623 #2 RT: 0.01 AV: 1 NL: 1.43E6  
 T: FTMS + p ESI Full ms [700.00-950.00]

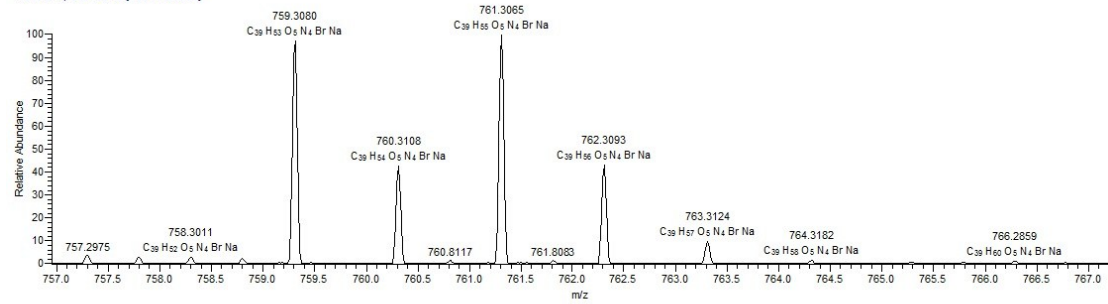

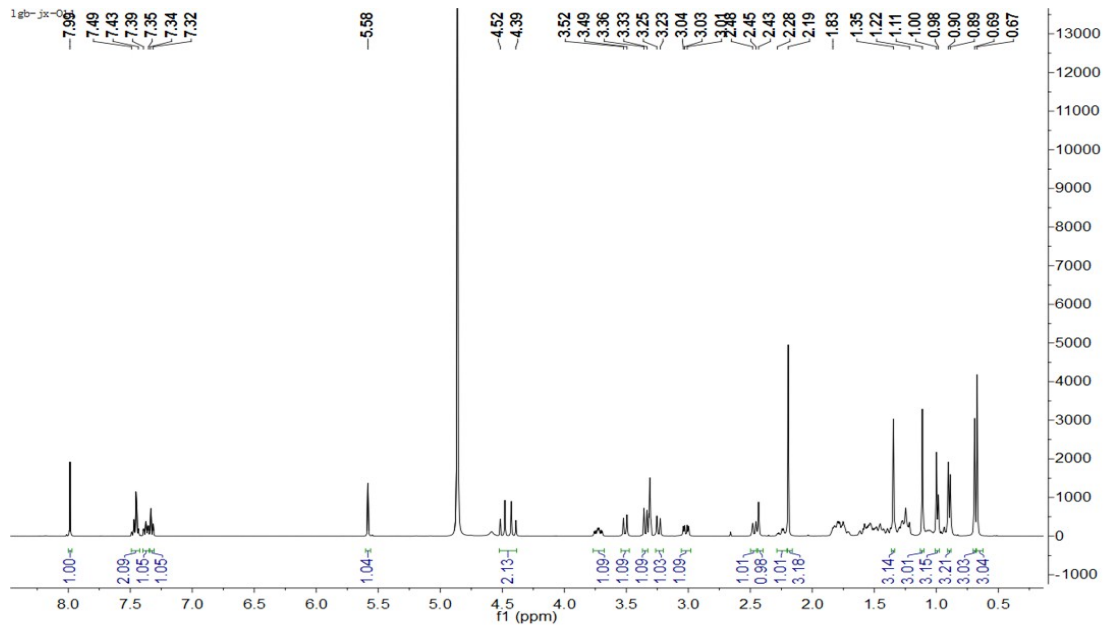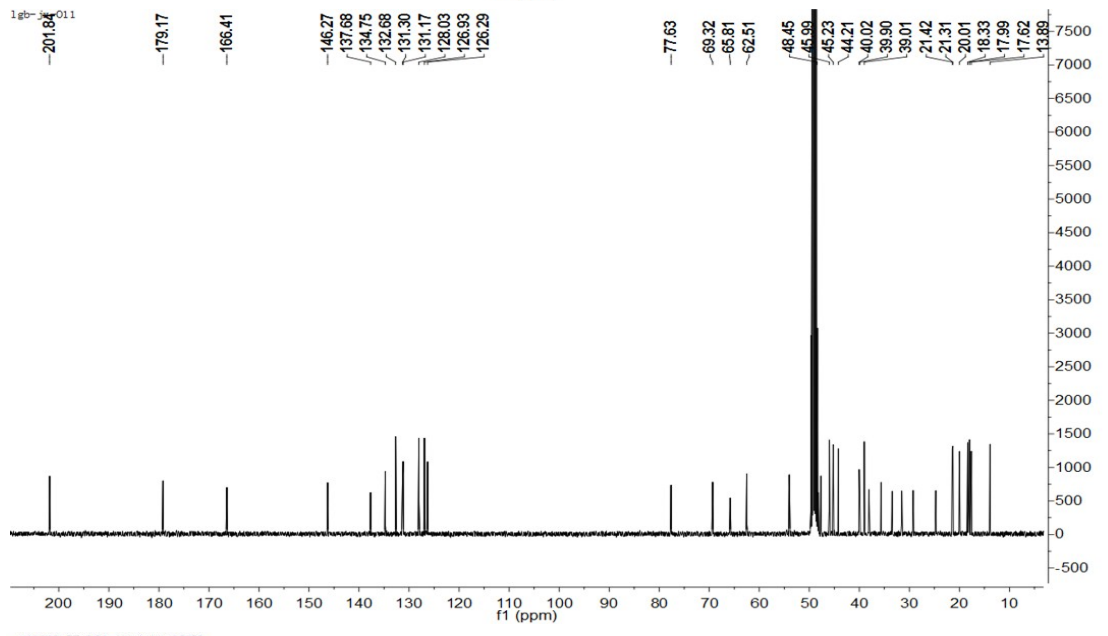

o11 #10 RT: 0.04 AV: 1 NL: 1.24E6  
T: FTMS + p ESI Full ms [800.00-800.00]

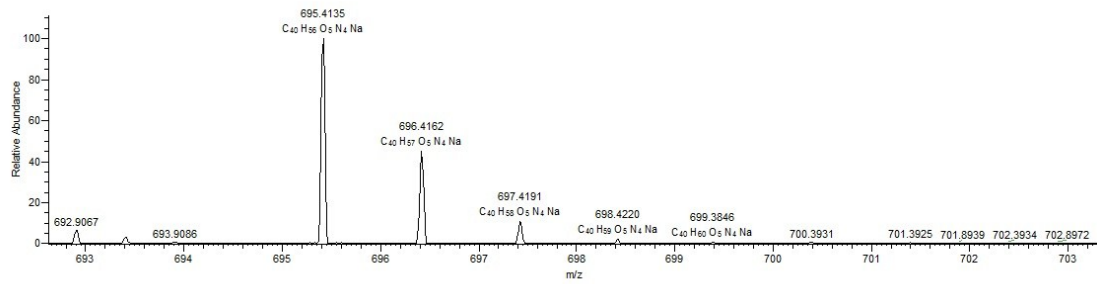

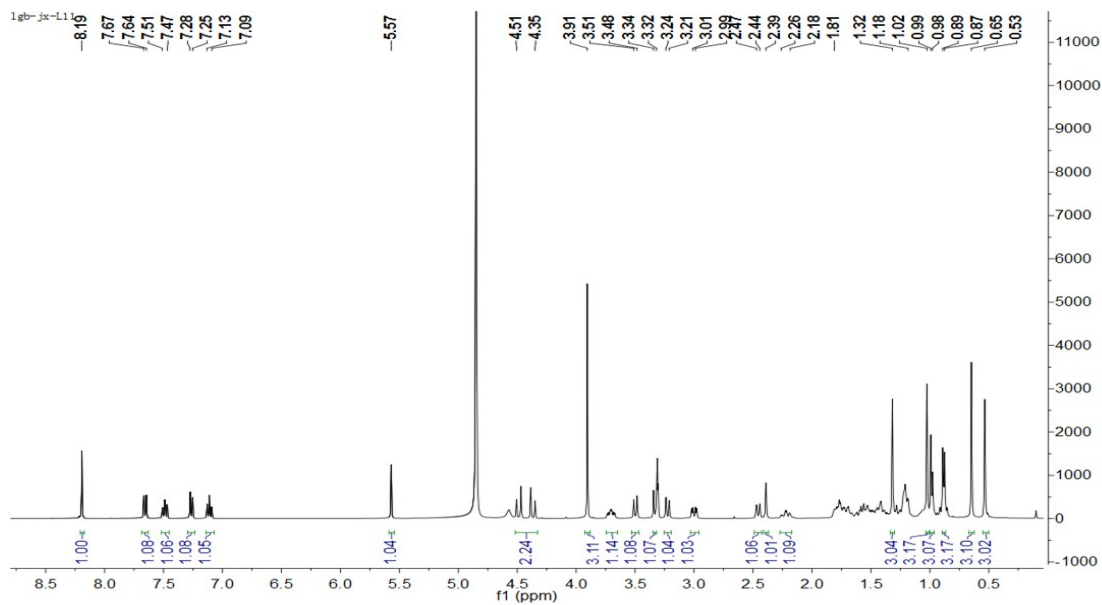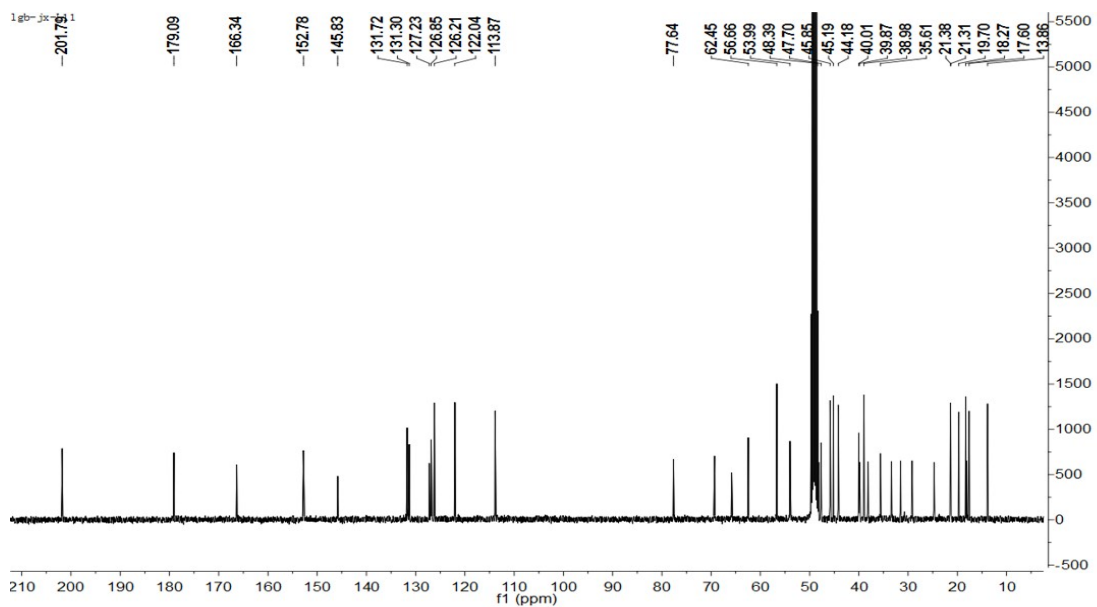

I11 #2 RT: 0.01 AV: 1 NL: 5.05E6  
T: FTMS + p ESI Full ms [600.00-750.00]

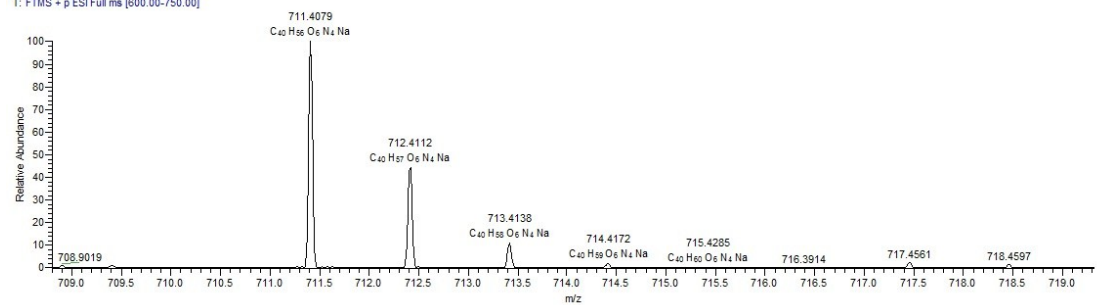

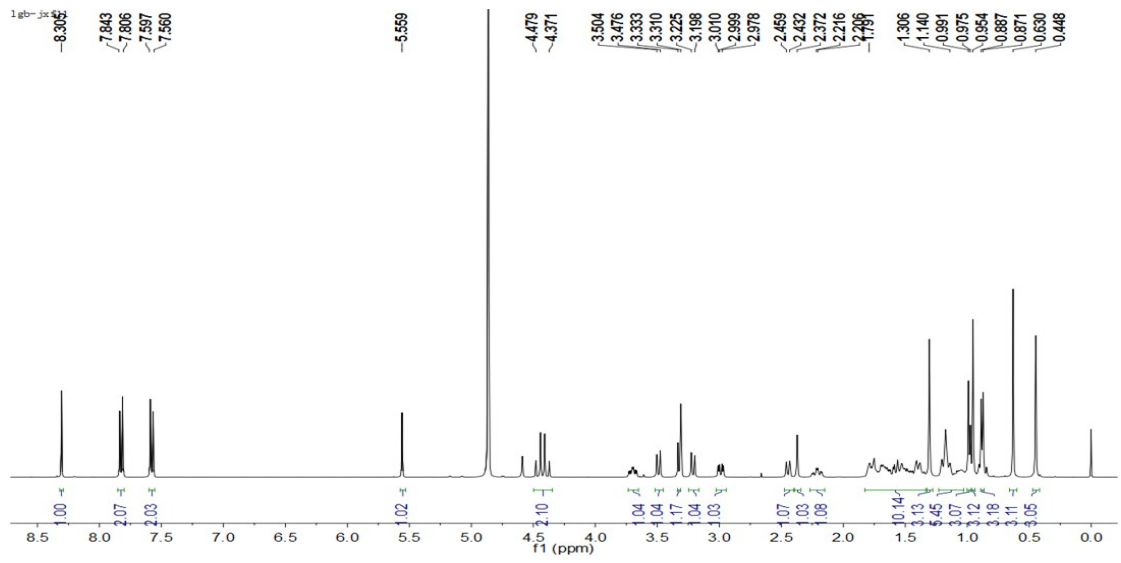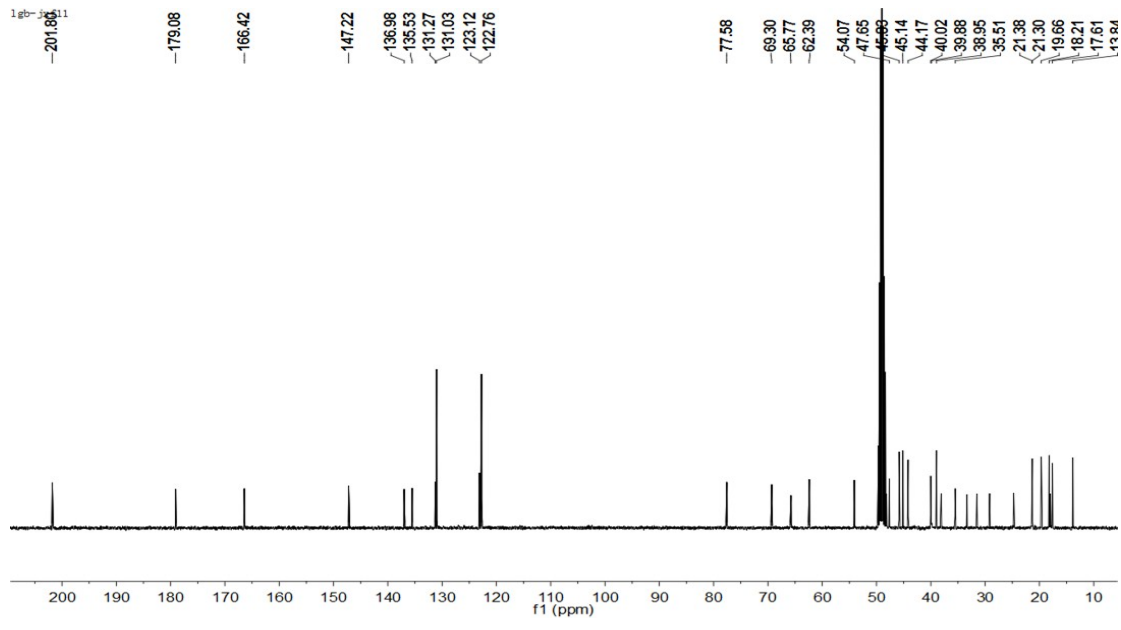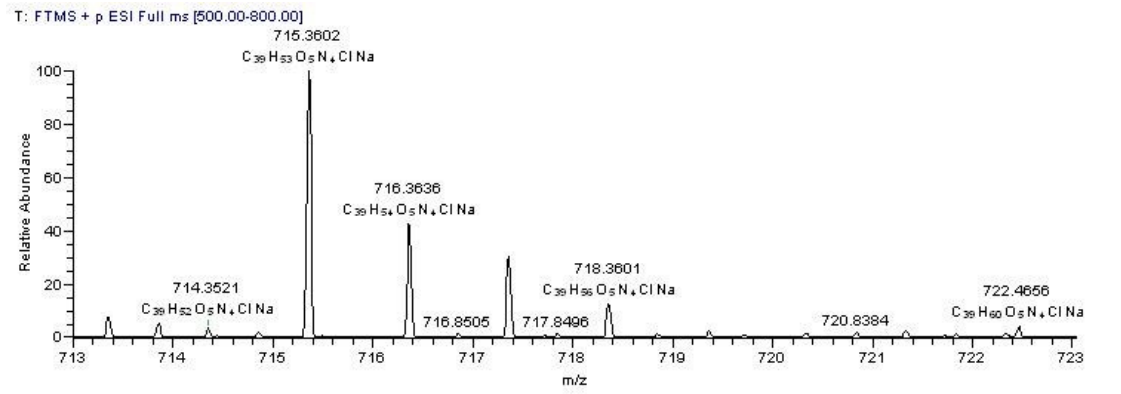

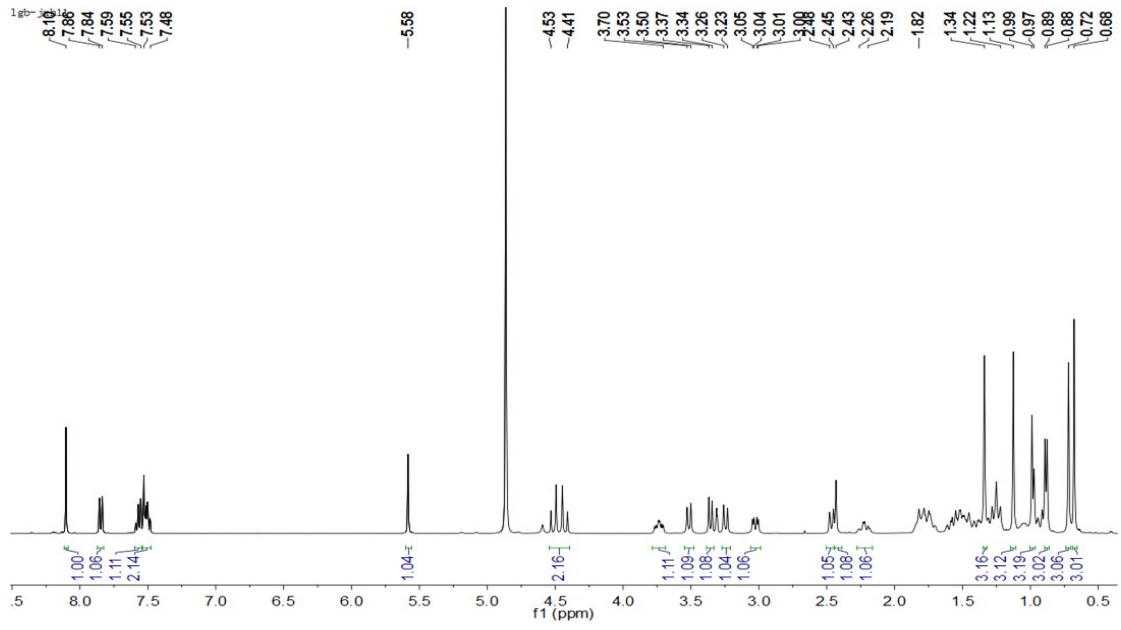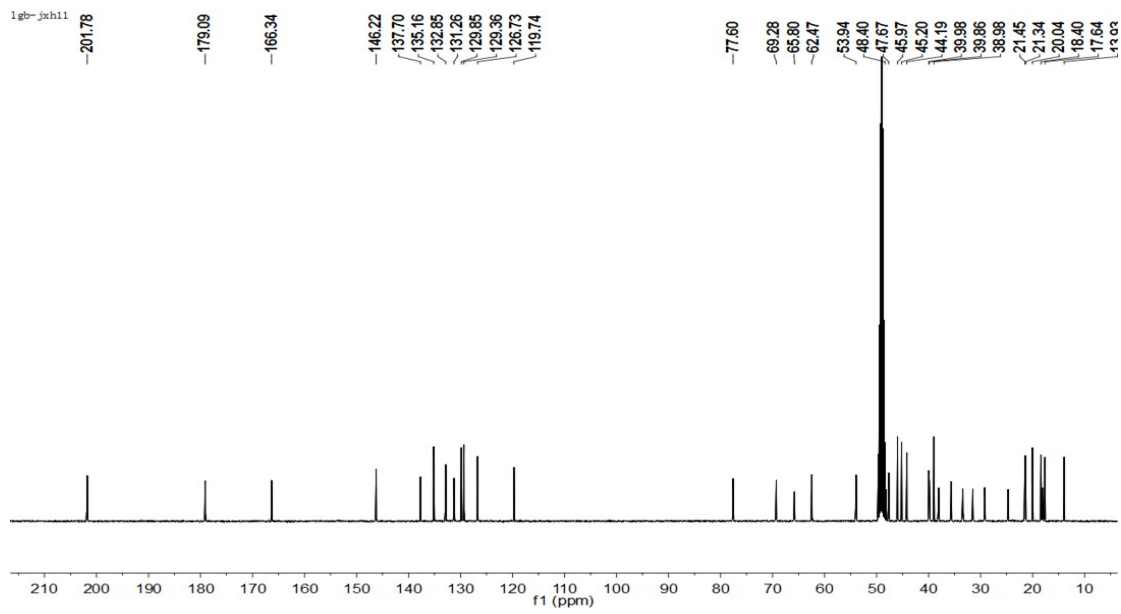

h11\_170704161525 #11 RT: 0.04 AV: 1 NL: 9.07ES  
 T: FTMS + p ESI Full ms [650.00-850.00]

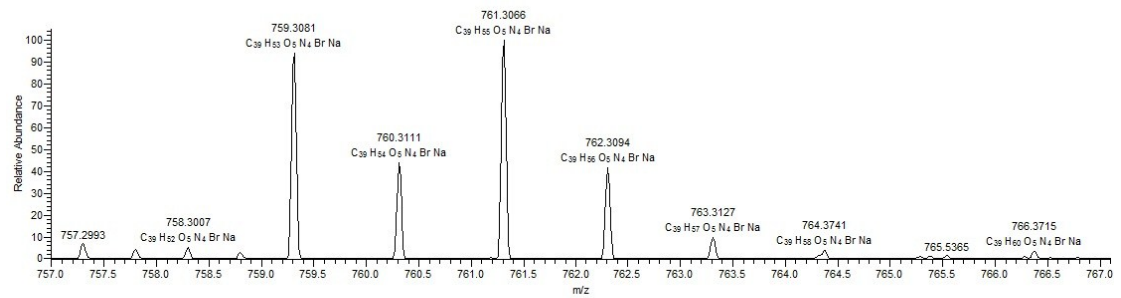

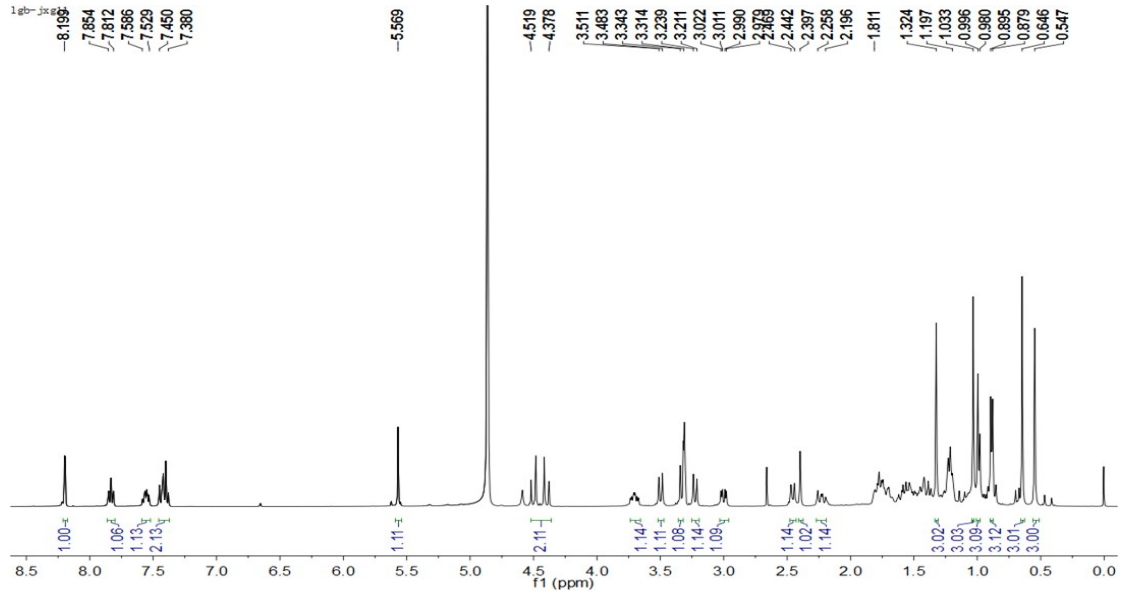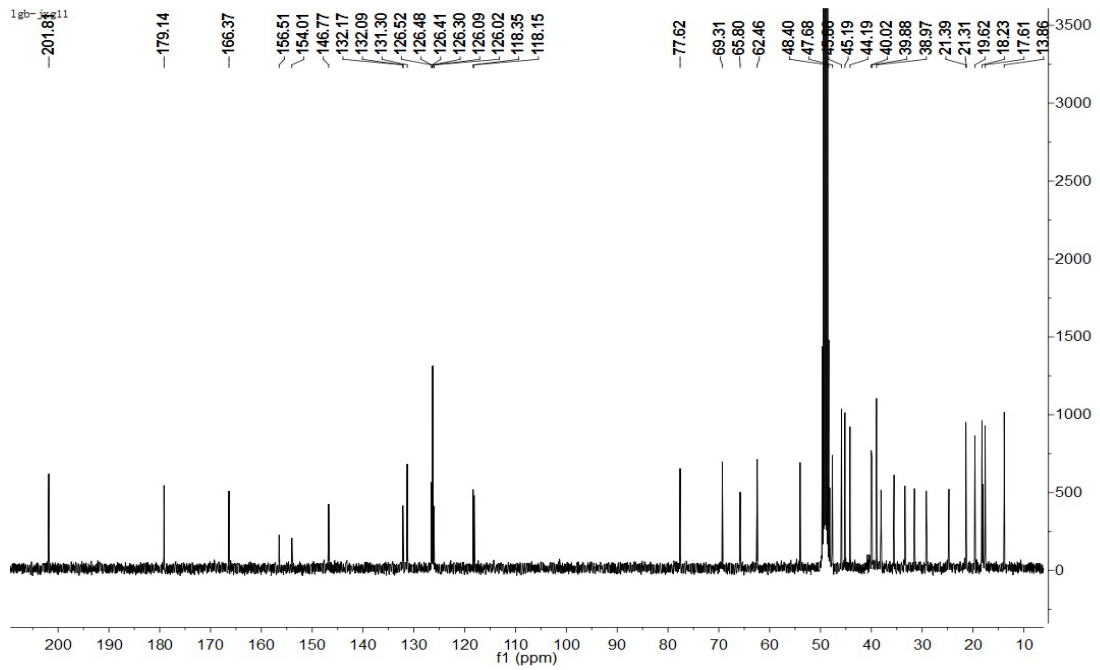

T: FTMS + p ESI Full ms [500.00-800.00]

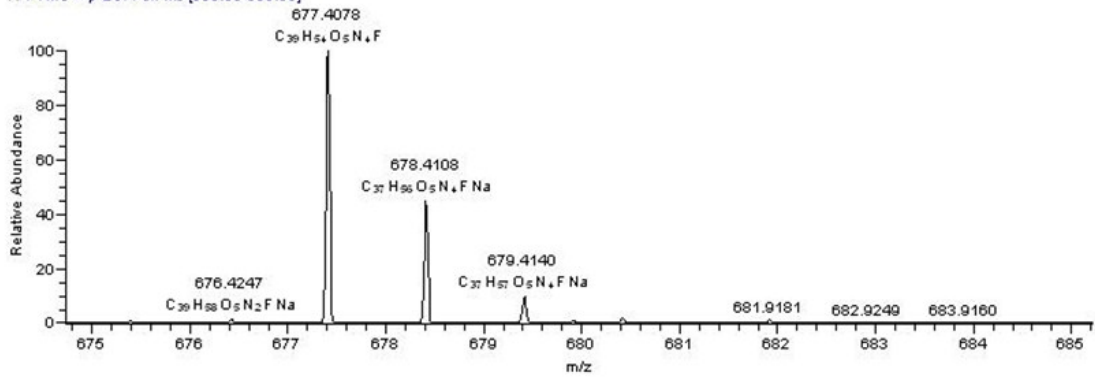

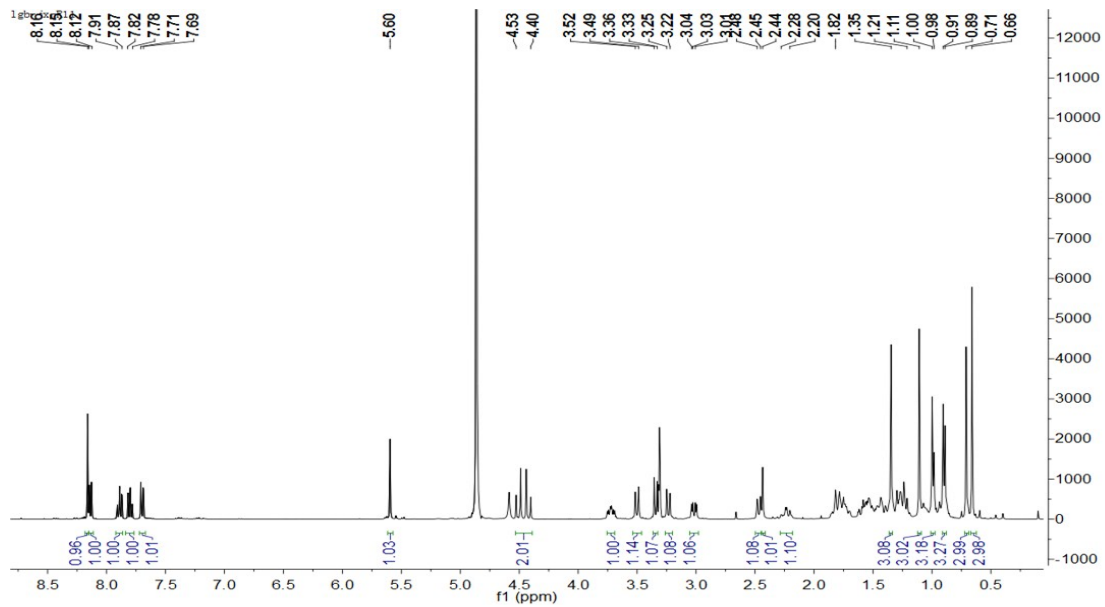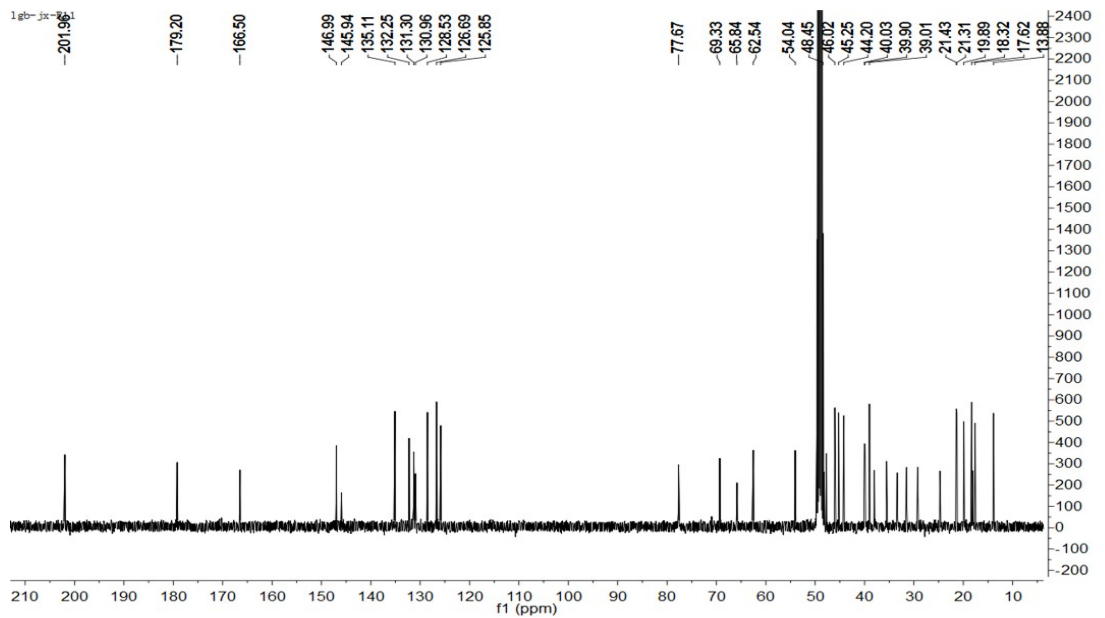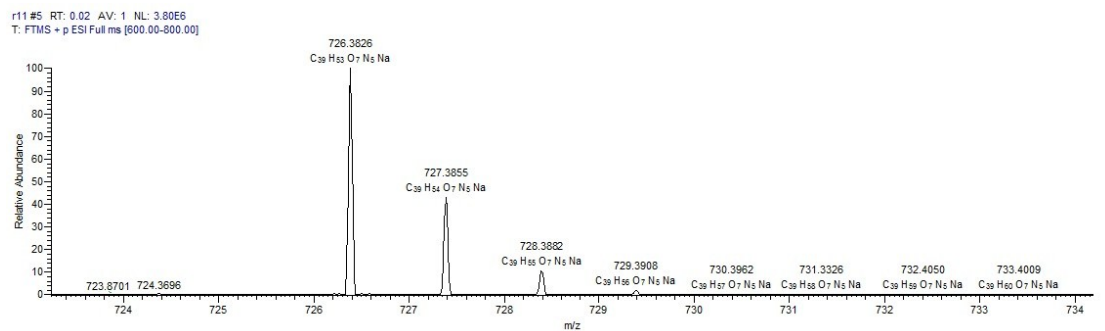

Supplement: c8md00620b1.pdf [file c8md00620b1.pdf]
